# Supplementary material for: Multiple Abiotic Stresses Applied Simultaneously Elicit Distinct Responses in Two Contrasting Rice Cultivars
Source: MDPI journal article supplement (doi:10.3390/ijms23031739), 2022-02-03
Supplement: s1 [file s1]

## **Habibpourmehraban et al Supplementary Information**

- Supplementary Figure S1
- Supplementary Table S1

# Habibpournmehraban et al Supplementary Figure S1

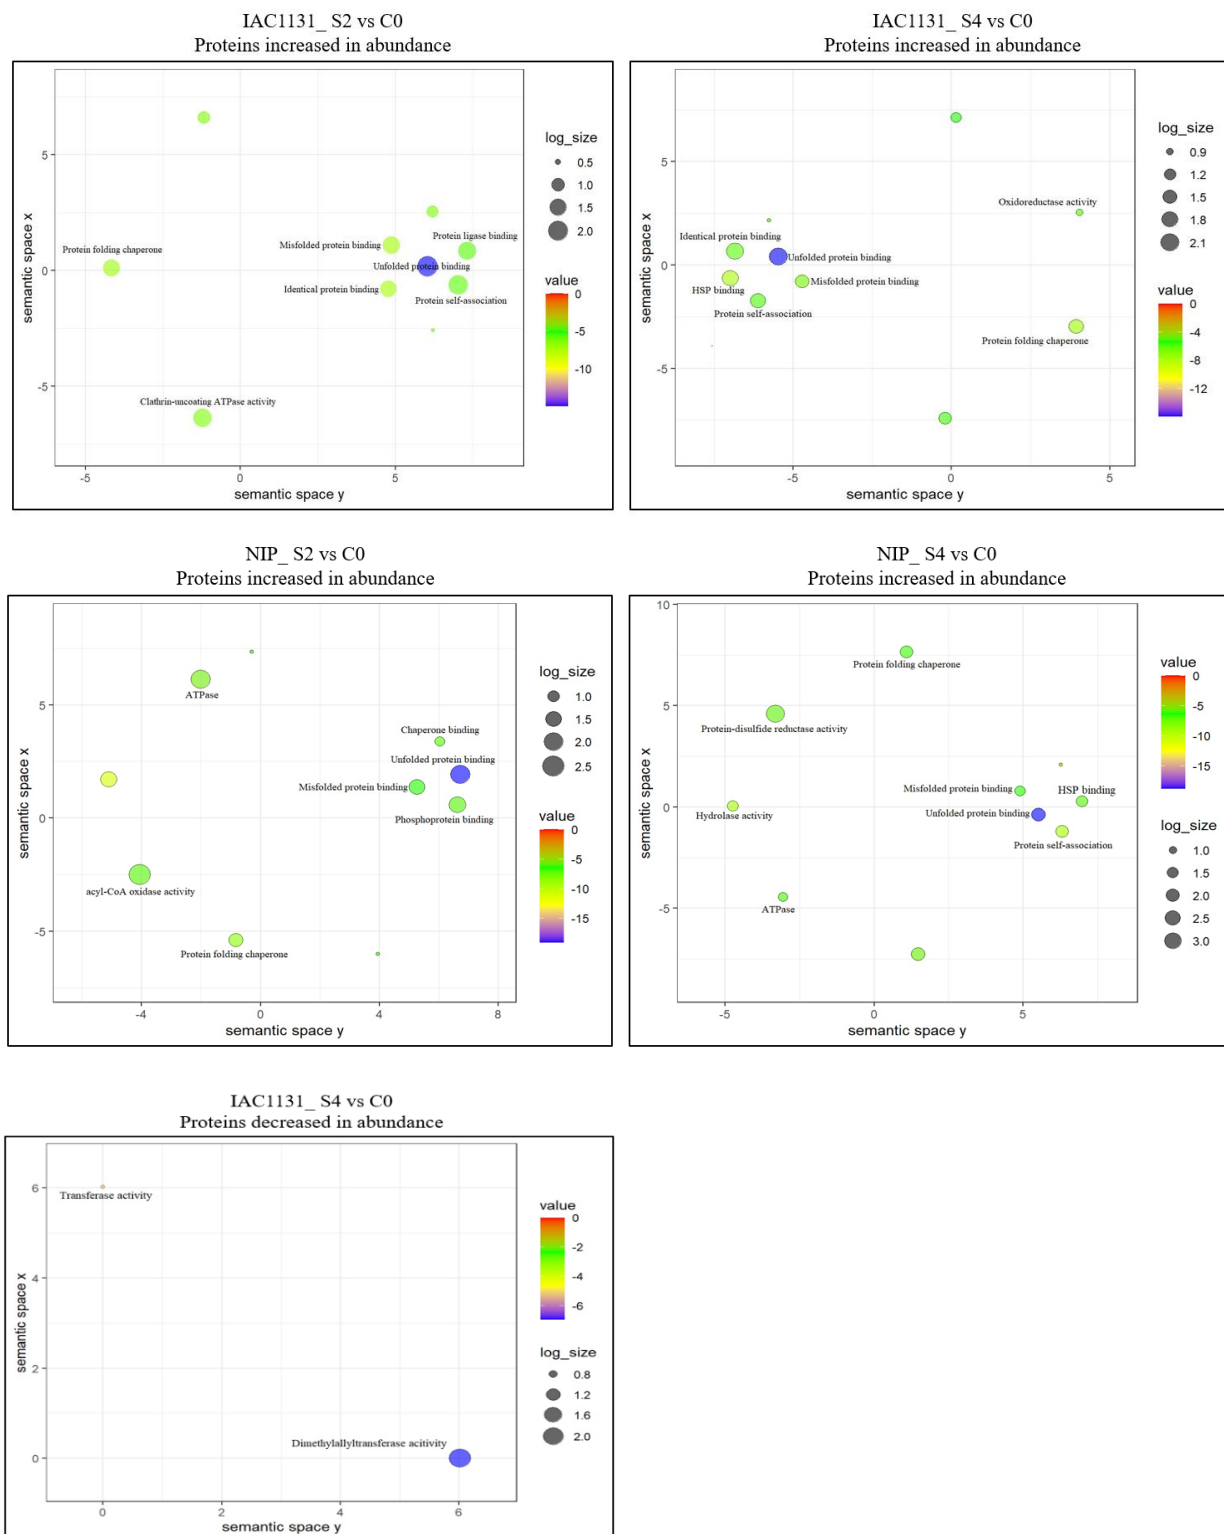

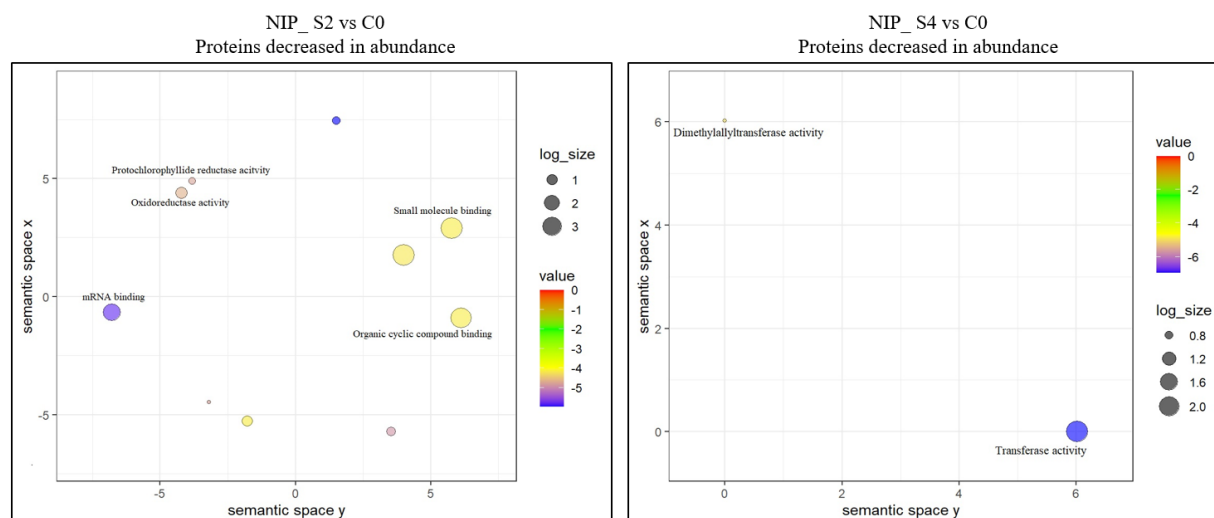

Figure S1. Molecular functions enriched ( $p$ -value < 0.05) in proteins increased or decreased in abundance (DEPs) in IAC1131 and Nipponbare after 2 day and 4 day multiple abiotic stress treatment. Each bubble indicates a significantly enriched term in a two-dimensional space derived by applying multidimensional scaling to a matrix of the GO terms' semantic similarities [1]. Bubble size is proportional to the frequency of the GO term in the *Oryza sativa* Uniprot database (bubbles of more general GO terms are larger), whereas color indicates the  $\log_{10}$   $p$ -value, with blue and yellow representing higher and lower  $p$ -value, respectively. The top 10 statistically most significant GO terms are plotted, of which only the key functions are labelled.

1. Supek, F.; Bošnjak, M.; Škunca, N.; Šmuc, T., Revigo summarizes and visualizes long lists of gene ontology terms. *PLOS ONE* **2011**, 6, (7), e21800.

Habibpournmehraban et al Supplementary Table S1

Details of all 987 Differentially Expressed Proteins

| Genotypes | Treatments                      | Increased in Abundance | Decreased in Abundance |
|-----------|---------------------------------|------------------------|------------------------|
| NIP       | Control 0 day vs Stress 2 days  | 332                    | 117                    |
|           | Control 0 day vs. Stress 4 days | 193                    | 47                     |
| IAC       | Control 0 day vs Stress 2 days  | 71                     | 7                      |
|           | Control 0 day vs. Stress 4 days | 193                    | 27                     |

Total

987

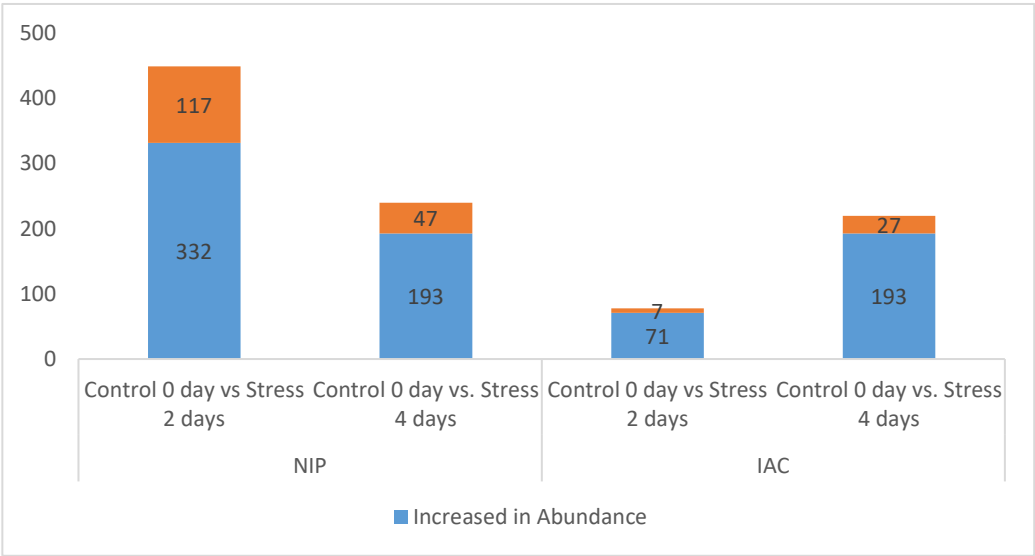

| IAC_ S2 vs C0_ Proteins increased in abundance |                                                                                                                                                                                 |      |
|------------------------------------------------|---------------------------------------------------------------------------------------------------------------------------------------------------------------------------------|------|
| Accession                                      | Description                                                                                                                                                                     | FC   |
| POC5A4                                         | Late embryogenesis abundant protein 19 OS= <i>Oryza sativa</i> subsp. japonica GN=LEA19 PE=2 SV=1                                                                               | 6.38 |
| Q94JF2                                         | Late embryogenesis abundant protein 14 OS= <i>Oryza sativa</i> subsp. japonica GN=LEA14 PE=2 SV=1                                                                               | 5.71 |
| Q8H4P7                                         | Os07g0147500 protein OS= <i>Oryza sativa</i> subsp. japonica GN=OJ1470_H06.117 PE=2 SV=1                                                                                        | 4.48 |
| A0A0P0XVP1                                     | Alpha-galactosidase OS= <i>Oryza sativa</i> subsp. japonica GN=Os10g0492900 PE=3 SV=1                                                                                           | 3.39 |
| Q84TB6                                         | Actin-depolymerizing factor 3 OS= <i>Oryza sativa</i> subsp. japonica GN=ADF3 PE=1 SV=1                                                                                         | 3.38 |
| A0A0P0WA35                                     | Os04g0415800 protein OS= <i>Oryza sativa</i> subsp. japonica GN=Os04g0415800 PE=4 SV=1                                                                                          | 3.37 |
| Q6ESR4                                         | Dehydrin DHN1 OS= <i>Oryza sativa</i> subsp. japonica GN=DHN1 PE=2 SV=1                                                                                                         | 3.24 |
| A0A0P0W604                                     | Os04g0107900 protein (Fragment) OS= <i>Oryza sativa</i> subsp. japonica GN=Os04g0107900 PE=4 SV=1                                                                               | 3.23 |
| Q5VRY1                                         | 18.0 kDa class II heat shock protein OS= <i>Oryza sativa</i> subsp. japonica GN=HSP18.0 PE=2 SV=1                                                                               | 3.23 |
| A0A0P0WEK5                                     | Os04g0608500 protein (Fragment) OS= <i>Oryza sativa</i> subsp. japonica GN=Os04g0608500 PE=4 SV=1                                                                               | 3.03 |
| Q6ATC1                                         | Os05g0160300 protein OS= <i>Oryza sativa</i> subsp. japonica GN=Os05g0160300 PE=2 SV=1                                                                                          | 2.94 |
| Q84Q72                                         | 18.1 kDa class I heat shock protein OS= <i>Oryza sativa</i> subsp. japonica GN=HSP18.1 PE=2 SV=1                                                                                | 2.82 |
| Q84Q77                                         | 17.9 kDa class I heat shock protein OS= <i>Oryza sativa</i> subsp. japonica GN=HSP17.9A PE=1 SV=1                                                                               | 2.78 |
| Q851F9                                         | Probable zinc metalloprotease EGY3, chloroplastic OS= <i>Oryza sativa</i> subsp. japonica GN=EGY3 PE=2 SV=1                                                                     | 2.64 |
| Q0DHF7                                         | Os05g0468800 protein OS= <i>Oryza sativa</i> subsp. japonica GN=Os05g0468800 PE=4 SV=1                                                                                          | 2.61 |
| Q6F2Y7                                         | Chaperone protein ClpB1 OS= <i>Oryza sativa</i> subsp. japonica GN=CLPB1 PE=2 SV=1                                                                                              | 2.60 |
| Q7X8R5                                         | Thioredoxin M2, chloroplastic OS= <i>Oryza sativa</i> subsp. japonica GN=Os04g0530600 PE=2 SV=2                                                                                 | 2.50 |
| Q337E2                                         | Expressed protein OS= <i>Oryza sativa</i> subsp. japonica GN=Os10g0505900 PE=4 SV=1                                                                                             | 2.46 |
| Q10MK4                                         | Mitochondrial import inner membrane translocase subunit Tim17/Tim22/Tim23 family protein, putative, expressed OS= <i>Oryza sativa</i> subsp. japonica GN=Os03g0305600 PE=2 SV=1 | 2.45 |
| Q9XFE4                                         | Peptidylprolyl isomerase OS= <i>Oryza sativa</i> subsp. japonica GN=Os04g0352400 PE=2 SV=2                                                                                      | 2.39 |
| Q653Y0                                         | Os06g0681200 protein OS= <i>Oryza sativa</i> subsp. japonica GN=Os06g0681200 PE=2 SV=1                                                                                          | 2.37 |
| Q0D3V0                                         | Os07g0664400 protein OS= <i>Oryza sativa</i> subsp. japonica GN=Os07g0664400 PE=4 SV=1                                                                                          | 2.34 |

|            |                                                                                                                                                  |      |
|------------|--------------------------------------------------------------------------------------------------------------------------------------------------|------|
| Q84J50     | 17.7 kDa class I heat shock protein OS= <i>Oryza sativa</i> subsp. <i>japonica</i><br>GN=HSP17.7 PE=2 SV=1                                       | 2.34 |
| Q6Z4I3     | Thioredoxin H2-1 OS= <i>Oryza sativa</i> subsp. <i>japonica</i> GN=Os07g0190800<br>PE=2 SV=1                                                     | 2.29 |
| Q655T1     | Phosphoglycerate kinase OS= <i>Oryza sativa</i> subsp. <i>japonica</i><br>GN=Os06g0668200 PE=2 SV=1                                              | 2.18 |
| Q7XJY1     | OSJNBb0088C09.10 protein OS= <i>Oryza sativa</i> subsp. <i>japonica</i><br>GN=Os04g0423400 PE=4 SV=1                                             | 2.15 |
| Q943K7     | 70 kDa heat shock protein OS= <i>Oryza sativa</i> subsp. <i>japonica</i><br>GN=Os01g0840100 PE=2 SV=1                                            | 2.13 |
| Q0J8R9     | Os04g0690800 protein OS= <i>Oryza sativa</i> subsp. <i>japonica</i><br>GN=Os04g0690800 PE=4 SV=1                                                 | 2.12 |
| Q7XCS3     | Cys/Met metabolism PLP-dependent enzyme family protein,<br>expressed OS= <i>Oryza sativa</i> subsp. <i>japonica</i> GN=Os10g0517500 PE=2<br>SV=1 | 2.12 |
| Q10N98     | 33 kDa secretory protein, putative, expressed OS= <i>Oryza sativa</i> subsp.<br><i>japonica</i> GN=Os03g0277600 PE=2 SV=1                        | 2.12 |
| Q6Z7V2     | 24.1 kDa heat shock protein, mitochondrial OS= <i>Oryza sativa</i> subsp.<br><i>japonica</i> GN=HSP24.1 PE=2 SV=1                                | 2.10 |
| Q851K1     | Germin-like protein 3-6 OS= <i>Oryza sativa</i> subsp. <i>japonica</i><br>GN=Os03g0694000 PE=2 SV=1                                              | 2.08 |
| Q8LNZ3     | UDP-glucose 4-epimerase 1 OS= <i>Oryza sativa</i> subsp. <i>japonica</i> GN=UGE-<br>1 PE=2 SV=1                                                  | 2.01 |
| Q8LHS0     | Neurofilament triplet M protein-like protein OS= <i>Oryza sativa</i> subsp.<br><i>japonica</i> GN=P0039H02.109 PE=2 SV=1                         | 1.98 |
| A0A0P0WFD3 | DNA-directed RNA polymerase subunit beta OS= <i>Oryza sativa</i> subsp.<br><i>japonica</i> GN=Os04g0641000 PE=3 SV=1                             | 1.98 |
| Q6YVU4     | Os07g0539300 protein OS= <i>Oryza sativa</i> subsp. <i>japonica</i><br>GN=P0696F12.36-1 PE=2 SV=1                                                | 1.95 |
| Q10NA1     | Heat shock cognate 70 kDa protein, putative, expressed OS= <i>Oryza</i><br><i>sativa</i> subsp. <i>japonica</i> GN=Os03g0277300 PE=3 SV=1        | 1.91 |
| A0A0N7KP29 | Os07g0683600 protein OS= <i>Oryza sativa</i> subsp. <i>japonica</i><br>GN=Os07g0683600 PE=4 SV=1                                                 | 1.89 |
| Q652V8     | 16.0 kDa heat shock protein, peroxisomal OS= <i>Oryza sativa</i> subsp.<br><i>japonica</i> GN=HSP16.0 PE=2 SV=1                                  | 1.86 |
| Q7FAS1     | Peroxisomal (S)-2-hydroxy-acid oxidase GLO3 OS= <i>Oryza sativa</i> subsp.<br><i>japonica</i> GN=GLO3 PE=2 SV=1                                  | 1.85 |
| Q6K7E9     | 18.6 kDa class III heat shock protein OS= <i>Oryza sativa</i> subsp. <i>japonica</i><br>GN=HSP18.6 PE=2 SV=1                                     | 1.85 |
| Q60DX1     | Thiamine pyrophosphokinase 3 OS= <i>Oryza sativa</i> subsp. <i>japonica</i><br>GN=TPK3 PE=2 SV=1                                                 | 1.84 |
| Q0JE83     | Os04g0311400 protein (Fragment) OS= <i>Oryza sativa</i> subsp. <i>japonica</i><br>GN=Os04g0311400 PE=3 SV=1                                      | 1.82 |
| Q75IC7     | Secretory carrier-associated membrane protein 4 OS= <i>Oryza sativa</i><br>subsp. <i>japonica</i> GN=SCAMP4 PE=2 SV=1                            | 1.78 |
| A0A0P0V4A6 | Os01g0571166 protein OS= <i>Oryza sativa</i> subsp. <i>japonica</i><br>GN=Os01g0571166 PE=4 SV=1                                                 | 1.77 |
| Q6L509     | Os05g0460000 protein OS= <i>Oryza sativa</i> subsp. <i>japonica</i><br>GN=Os05g0460000 PE=2 SV=1                                                 | 1.76 |

|            |                                                                                                                            |      |
|------------|----------------------------------------------------------------------------------------------------------------------------|------|
| Q7G649     | Expressed protein OS= <i>Oryza sativa</i> subsp. <i>japonica</i><br>GN=LOC_Os10g18340 PE=2 SV=1                            | 1.76 |
| Q6L4Z4     | Os05g0462400 protein OS= <i>Oryza sativa</i> subsp. <i>japonica</i><br>GN=Os05g0462400 PE=4 SV=1                           | 1.75 |
| A0A0P0XGD0 | Os08g0425800 protein OS= <i>Oryza sativa</i> subsp. <i>japonica</i><br>GN=Os08g0425800 PE=4 SV=1                           | 1.71 |
| Q6Z312     | bZIP transcription factor 23 OS= <i>Oryza sativa</i> subsp. <i>japonica</i><br>GN=BZIP23 PE=2 SV=1                         | 1.69 |
| Q7FAX1     | Peroxygenase OS= <i>Oryza sativa</i> subsp. <i>japonica</i> GN=PXG PE=2 SV=1                                               | 1.66 |
| A0A0P0VAH1 | Os01g0849000 protein (Fragment) OS= <i>Oryza sativa</i> subsp. <i>japonica</i><br>GN=Os01g0849000 PE=4 SV=1                | 1.64 |
| Q94E65     | Os01g0172800 protein OS= <i>Oryza sativa</i> subsp. <i>japonica</i><br>GN=Os01g0172800 PE=2 SV=1                           | 1.63 |
| A0A0P0VFD3 | Os02g0177600 protein (Fragment) OS= <i>Oryza sativa</i> subsp. <i>japonica</i><br>GN=Os02g0177600 PE=4 SV=1                | 1.62 |
| Q7XUW5     | 23.2 kDa heat shock protein OS= <i>Oryza sativa</i> subsp. <i>japonica</i><br>GN=HSP23.2 PE=2 SV=2                         | 1.61 |
| Q67WJ2     | ATP-dependent zinc metalloprotease FTSH 6, chloroplastic OS= <i>Oryza sativa</i> subsp. <i>japonica</i> GN=FTSH6 PE=3 SV=1 | 1.59 |
| Q6Z6A7     | Annexin OS= <i>Oryza sativa</i> subsp. <i>japonica</i> GN=Os02g0753800 PE=3 SV=1                                           | 1.58 |
| Q6ATF8     | Os05g0272900 protein OS= <i>Oryza sativa</i> subsp. <i>japonica</i><br>GN=Os05g0272900 PE=2 SV=1                           | 1.56 |
| Q10PW8     | DnaK protein, expressed OS= <i>Oryza sativa</i> subsp. <i>japonica</i><br>GN=Os03g0218500 PE=2 SV=1                        | 1.56 |
| Q10LP5     | Sucrose synthase 4 OS= <i>Oryza sativa</i> subsp. <i>japonica</i> GN=SUS4 PE=2 SV=1                                        | 1.55 |
| Q5N770     | Os01g0813900 protein OS= <i>Oryza sativa</i> subsp. <i>japonica</i><br>GN=Os01g0813900 PE=4 SV=1                           | 1.54 |
| Q40711     | Dehydrin family protein, expressed OS= <i>Oryza sativa</i> subsp. <i>japonica</i><br>GN=Os03g0655400 PE=2 SV=1             | 1.54 |
| Q6YVX5     | Chloride channel protein OS= <i>Oryza sativa</i> subsp. <i>japonica</i><br>GN=Os02g0558100 PE=3 SV=1                       | 1.54 |
| Q2QY04     | PP2A regulatory subunit TAP46 OS= <i>Oryza sativa</i> subsp. <i>japonica</i><br>GN=TAP46 PE=2 SV=1                         | 1.54 |
| Q5ZAV7     | Os01g0783500 protein OS= <i>Oryza sativa</i> subsp. <i>japonica</i><br>GN=Os01g0783500 PE=2 SV=1                           | 1.54 |
| Q2QNV2     | Fiber protein Fb19, putative, expressed OS= <i>Oryza sativa</i> subsp. <i>japonica</i> GN=LOC_Os12g36640 PE=2 SV=1         | 1.53 |
| Q65XA0     | Probable glutathione S-transferase DHAR1, cytosolic OS= <i>Oryza sativa</i> subsp. <i>japonica</i> GN=DHAR1 PE=1 SV=1      | 1.53 |
| Q6YSB2     | Glutamate decarboxylase OS= <i>Oryza sativa</i> subsp. <i>japonica</i><br>GN=P0104B02.16-2 PE=2 SV=1                       | 1.53 |
| Q69JX7     | Drought-induced S-like ribonuclease OS= <i>Oryza sativa</i> subsp. <i>japonica</i><br>GN=Os09g0537700 PE=2 SV=1            | 1.53 |
| Q5QMT0     | Beta-glucosidase 1 OS= <i>Oryza sativa</i> subsp. <i>japonica</i> GN=BGLU1 PE=2 SV=1                                       | 1.52 |

Q7XKI7

Mitochondrial intermembrane space import and assembly protein 40  
homolog OS=*Oryza sativa* subsp. *japonica* GN=MIA40 PE=2 SV=2

1.52



## IAC\_ S2 vs C0\_ Proteins decreased in abundance

| Accession | Description                                                                                                                                                  | FC   |       |
|-----------|--------------------------------------------------------------------------------------------------------------------------------------------------------------|------|-------|
| Q0DKB2    | Glycosyltransferase OS=Oryza sativa subsp. japonica<br>GN=Os05g0177500 PE=2 SV=2                                                                             | 0.38 | -2.64 |
| Q6Z401    | Sugar transport protein MST6 OS=Oryza sativa subsp.<br>japonica GN=MST6 PE=1 SV=1                                                                            | 0.50 | -2.00 |
| Q5ZC82    | Cytokinin riboside 5'-monophosphate<br>phosphoribohydrolase LOG OS=Oryza sativa subsp.<br>japonica GN=LOG PE=1 SV=1                                          | 0.60 | -1.67 |
| Q67VQ4    | BolA-like OS=Oryza sativa subsp. japonica<br>GN=Os06g0484600 PE=2 SV=1                                                                                       | 0.60 | -1.66 |
| Q10M50    | Magnesium-chelatase subunit ChlH, chloroplastic<br>OS=Oryza sativa subsp. japonica GN=CHLH PE=1 SV=1<br>Os08g0556900 protein OS=Oryza sativa subsp. japonica | 0.63 | -1.58 |
| Q6ZJ18    | GN=Os08g0556900 PE=2 SV=1                                                                                                                                    | 0.65 | -1.55 |
| Q0D5I5    | Os07g0558300 protein OS=Oryza sativa subsp. japonica<br>GN=Os07g0558300 PE=2 SV=1                                                                            | 0.66 | -1.52 |

| IAC_ S4 vs C0_ Proteins increased in abundance |                                                                                                                                                                                 |      |
|------------------------------------------------|---------------------------------------------------------------------------------------------------------------------------------------------------------------------------------|------|
| Accession                                      | Description                                                                                                                                                                     | FC   |
| POC5A4                                         | Late embryogenesis abundant protein 19 OS= <i>Oryza sativa</i> subsp. japonica GN=LEA19 PE=2 SV=1                                                                               | 7.79 |
| Q8H4P7                                         | Os07g0147500 protein OS= <i>Oryza sativa</i> subsp. japonica GN=OJ1470_H06.117 PE=2 SV=1                                                                                        | 7.03 |
| Q5VRY1                                         | 18.0 kDa class II heat shock protein OS= <i>Oryza sativa</i> subsp. japonica GN=HSP18.0 PE=2 SV=1                                                                               | 5.36 |
| Q84TB6                                         | Actin-depolymerizing factor 3 OS= <i>Oryza sativa</i> subsp. japonica GN=ADF3 PE=1 SV=1                                                                                         | 4.60 |
| Q0J8R9                                         | Os04g0690800 protein OS= <i>Oryza sativa</i> subsp. japonica GN=Os04g0690800 PE=4 SV=1                                                                                          | 4.23 |
| Q94JF2                                         | Late embryogenesis abundant protein 14 OS= <i>Oryza sativa</i> subsp. japonica GN=LEA14 PE=2 SV=1                                                                               | 3.98 |
| Q84Q77                                         | 17.9 kDa class I heat shock protein OS= <i>Oryza sativa</i> subsp. japonica GN=HSP17.9A PE=1 SV=1                                                                               | 3.96 |
| Q7X8R5                                         | Thioredoxin M2, chloroplastic OS= <i>Oryza sativa</i> subsp. japonica GN=Os04g0530600 PE=2 SV=2                                                                                 | 3.91 |
| Q10MK4                                         | Mitochondrial import inner membrane translocase subunit Tim17/Tim22/Tim23 family protein, putative, expressed OS= <i>Oryza sativa</i> subsp. japonica GN=Os03g0305600 PE=2 SV=1 | 3.80 |
| Q10NA1                                         | Heat shock cognate 70 kDa protein, putative, expressed OS= <i>Oryza sativa</i> subsp. japonica GN=Os03g0277300 PE=3 SV=1                                                        | 3.54 |
| O04138                                         | Chitinase 4 OS= <i>Oryza sativa</i> subsp. japonica GN=Cht4 PE=2 SV=2                                                                                                           | 3.45 |
| A0A0P0XVP1                                     | Alpha-galactosidase OS= <i>Oryza sativa</i> subsp. japonica GN=Os10g0492900 PE=3 SV=1                                                                                           | 3.30 |
| Q84Q72                                         | 18.1 kDa class I heat shock protein OS= <i>Oryza sativa</i> subsp. japonica GN=HSP18.1 PE=2 SV=1                                                                                | 3.30 |
| Q655T1                                         | Phosphoglycerate kinase OS= <i>Oryza sativa</i> subsp. japonica GN=Os06g0668200 PE=2 SV=1                                                                                       | 3.26 |
| A0A0P0W604                                     | Os04g0107900 protein (Fragment) OS= <i>Oryza sativa</i> subsp. japonica GN=Os04g0107900 PE=4 SV=1                                                                               | 3.26 |
| A0A0P0WA35                                     | Os04g0415800 protein OS= <i>Oryza sativa</i> subsp. japonica GN=Os04g0415800 PE=4 SV=1                                                                                          | 3.25 |
| Q6Z4I3                                         | Thioredoxin H2-1 OS= <i>Oryza sativa</i> subsp. japonica GN=Os07g0190800 PE=2 SV=1                                                                                              | 3.20 |
| Q653Y0                                         | Os06g0681200 protein OS= <i>Oryza sativa</i> subsp. japonica GN=Os06g0681200 PE=2 SV=1                                                                                          | 3.20 |
| Q6K7E9                                         | 18.6 kDa class III heat shock protein OS= <i>Oryza sativa</i> subsp. japonica GN=HSP18.6 PE=2 SV=1                                                                              | 3.20 |
| Q851K1                                         | Germin-like protein 3-6 OS= <i>Oryza sativa</i> subsp. japonica GN=Os03g0694000 PE=2 SV=1                                                                                       | 3.13 |
| Q851F9                                         | Probable zinc metalloprotease EGY3, chloroplastic OS= <i>Oryza sativa</i> subsp. japonica GN=EGY3 PE=2 SV=1                                                                     | 3.07 |

|            |                                                                                                                 |      |
|------------|-----------------------------------------------------------------------------------------------------------------|------|
| Q652V8     | 16.0 kDa heat shock protein, peroxisomal OS= <i>Oryza sativa</i> subsp. japonica GN=HSP16.0 PE=2 SV=1           | 3.06 |
| Q0DHF7     | Os05g0468800 protein OS= <i>Oryza sativa</i> subsp. japonica GN=Os05g0468800 PE=4 SV=1                          | 3.04 |
| Q337E2     | Expressed protein OS= <i>Oryza sativa</i> subsp. japonica GN=Os10g0505900 PE=4 SV=1                             | 3.01 |
| Q9XFE4     | Peptidylprolyl isomerase OS= <i>Oryza sativa</i> subsp. japonica GN=Os04g0352400 PE=2 SV=2                      | 2.98 |
| Q2QLS7     | Os12g0630200 protein OS= <i>Oryza sativa</i> subsp. japonica GN=Os12g0630200 PE=4 SV=1                          | 2.94 |
| Q10QC5     | Os03g0201600 protein OS= <i>Oryza sativa</i> subsp. japonica GN=Os03g0201600 PE=2 SV=1                          | 2.83 |
| Q7XJY1     | OSJNBb0088C09.10 protein OS= <i>Oryza sativa</i> subsp. japonica GN=Os04g0423400 PE=4 SV=1                      | 2.74 |
| Q9FWU4     | Os10g0491000 protein OS= <i>Oryza sativa</i> subsp. japonica GN=LOC_Os10g34930 PE=2 SV=1                        | 2.71 |
| Q6ESR4     | Dehydrin DHN1 OS= <i>Oryza sativa</i> subsp. japonica GN=DHN1 PE=2 SV=1                                         | 2.70 |
| Q8LHS0     | Neurofilament triplet M protein-like protein OS= <i>Oryza sativa</i> subsp. japonica GN=P0039H02.109 PE=2 SV=1  | 2.68 |
| Q5VP66     | Os01g0644000 protein OS= <i>Oryza sativa</i> subsp. japonica GN=Os01g0644000 PE=2 SV=1                          | 2.64 |
| Q94CS9     | Probable aquaporin TIP1-2 OS= <i>Oryza sativa</i> subsp. japonica GN=TIP1-2 PE=2 SV=1                           | 2.64 |
| Q94CR1     | Beta 1,3-glucanase OS= <i>Oryza sativa</i> subsp. japonica GN=P0660F12.19 PE=2 SV=1                             | 2.63 |
| Q84J50     | 17.7 kDa class I heat shock protein OS= <i>Oryza sativa</i> subsp. japonica GN=HSP17.7 PE=2 SV=1                | 2.55 |
| A0A0P0WAD7 | Os04g0423600 protein OS= <i>Oryza sativa</i> subsp. japonica GN=Os04g0423600 PE=4 SV=1                          | 2.53 |
| Q6ZCR3     | Germin-like protein 8-12 OS= <i>Oryza sativa</i> subsp. japonica GN=Os08g0231400 PE=2 SV=1                      | 2.50 |
| Q943K7     | 70 kDa heat shock protein OS= <i>Oryza sativa</i> subsp. japonica GN=Os01g0840100 PE=2 SV=1                     | 2.47 |
| Q9FYR9     | Class III chitinase OS= <i>Oryza sativa</i> subsp. japonica GN=chib1 PE=2 SV=1                                  | 2.44 |
| Q10N98     | 33 kDa secretory protein, putative, expressed OS= <i>Oryza sativa</i> subsp. japonica GN=Os03g0277600 PE=2 SV=1 | 2.42 |
| A0A0P0XGD0 | Os08g0425800 protein OS= <i>Oryza sativa</i> subsp. japonica GN=Os08g0425800 PE=4 SV=1                          | 2.42 |
| Q2R5M2     | Carboxypeptidase OS= <i>Oryza sativa</i> subsp. japonica GN=LOC_Os11g24510 PE=3 SV=1                            | 2.40 |
| Q6YVU4     | Os07g0539300 protein OS= <i>Oryza sativa</i> subsp. japonica GN=P0696F12.36-1 PE=2 SV=1                         | 2.31 |
| A0A0P0W1B6 | Os03g0661600 protein (Fragment) OS= <i>Oryza sativa</i> subsp. japonica GN=Os03g0661600 PE=4 SV=1               | 2.31 |
| A0A0N7KP29 | Os07g0683600 protein OS= <i>Oryza sativa</i> subsp. japonica GN=Os07g0683600 PE=4 SV=1                          | 2.28 |

|            |                                                                                                                 |      |
|------------|-----------------------------------------------------------------------------------------------------------------|------|
| Q7FAX1     | Peroxygenase OS= <i>Oryza sativa</i> subsp. <i>japonica</i> GN=PXG PE=2 SV=1                                    | 2.26 |
| P27777     | 16.9 kDa class I heat shock protein 1 OS= <i>Oryza sativa</i> subsp. <i>japonica</i> GN=HSP16.9A PE=1 SV=1      | 2.26 |
| Q10MP7     | Os03g0300400 protein OS= <i>Oryza sativa</i> subsp. <i>japonica</i> GN=Os03g0300400 PE=2 SV=1                   | 2.22 |
| Q7G649     | Expressed protein OS= <i>Oryza sativa</i> subsp. <i>japonica</i> GN=LOC_Os10g18340 PE=2 SV=1                    | 2.18 |
| Q8S1C7     | Cytochrome P450 (CYP72C)-like OS= <i>Oryza sativa</i> subsp. <i>japonica</i> GN=CYP72A32 PE=2 SV=1              | 2.16 |
| Q0JNL7     | Calmodulin-3 OS= <i>Oryza sativa</i> subsp. <i>japonica</i> GN=CAM3 PE=2 SV=1                                   | 2.16 |
| Q94E74     | Os01g0511100 protein OS= <i>Oryza sativa</i> subsp. <i>japonica</i> GN=Os01g0511100 PE=2 SV=1                   | 2.16 |
| Q6Z7V2     | 24.1 kDa heat shock protein, mitochondrial OS= <i>Oryza sativa</i> subsp. <i>japonica</i> GN=HSP24.1 PE=2 SV=1  | 2.15 |
| Q42993     | Chitinase 1 OS= <i>Oryza sativa</i> subsp. <i>japonica</i> GN=Cht1 PE=2 SV=1                                    | 2.14 |
| Q6L509     | Os05g0460000 protein OS= <i>Oryza sativa</i> subsp. <i>japonica</i> GN=Os05g0460000 PE=2 SV=1                   | 2.13 |
| Q9XHY5     | Os01g0246400 protein OS= <i>Oryza sativa</i> subsp. <i>japonica</i> GN=OSJNBa0049B20.7 PE=2 SV=1                | 2.12 |
| B9FYM4     | Os08g0101400 protein OS= <i>Oryza sativa</i> subsp. <i>japonica</i> GN=Os08g0101400 PE=4 SV=1                   | 2.12 |
| Q6F2Y7     | Chaperone protein ClpB1 OS= <i>Oryza sativa</i> subsp. <i>japonica</i> GN=CLPB1 PE=2 SV=1                       | 2.08 |
| Q5N7Y1     | Os01g0910900 protein OS= <i>Oryza sativa</i> subsp. <i>japonica</i> GN=Os01g0910900 PE=2 SV=1                   | 2.08 |
| Q0D840     | Thioredoxin H1 OS= <i>Oryza sativa</i> subsp. <i>japonica</i> GN=TRXH PE=1 SV=1                                 | 2.05 |
| Q0IZF1     | Os09g0572700 protein OS= <i>Oryza sativa</i> subsp. <i>japonica</i> GN=Os09g0572700 PE=2 SV=1                   | 2.04 |
| Q8RU06     | Cellulase containing protein, expressed OS= <i>Oryza sativa</i> subsp. <i>japonica</i> GN=OJ1208D02.5 PE=2 SV=1 | 2.04 |
| B9FCZ7     | Os04g0663700 protein OS= <i>Oryza sativa</i> subsp. <i>japonica</i> GN=Os04g0663700 PE=4 SV=1                   | 2.03 |
| Q2QQS1     | KE2 family protein, expressed OS= <i>Oryza sativa</i> subsp. <i>japonica</i> GN=Os12g0485800 PE=2 SV=1          | 2.02 |
| Q0IQK9     | Non-specific lipid-transfer protein 1 OS= <i>Oryza sativa</i> subsp. <i>japonica</i> GN=LTP PE=1 SV=1           | 2.00 |
| Q7XJ39     | Non-specific lipid-transfer protein 2A OS= <i>Oryza sativa</i> subsp. <i>japonica</i> GN=LTP2-A PE=3 SV=2       | 2.00 |
| Q6AUF2     | Os05g0565400 protein OS= <i>Oryza sativa</i> subsp. <i>japonica</i> GN=Os05g0565400 PE=2 SV=1                   | 1.99 |
| A0A0P0V486 | Os01g0571100 protein (Fragment) OS= <i>Oryza sativa</i> subsp. <i>japonica</i> GN=Os01g0571100 PE=4 SV=1        | 1.98 |
| A0A0P0W3Z6 | Os03g0750100 protein OS= <i>Oryza sativa</i> subsp. <i>japonica</i> GN=Os03g0750100 PE=4 SV=1                   | 1.94 |
| Q6ETD9     | Calmodulin-binding protein-like OS= <i>Oryza sativa</i> subsp. <i>japonica</i> GN=Os02g0105500 PE=2 SV=1        | 1.93 |

|            |                                                                                                                                                      |      |
|------------|------------------------------------------------------------------------------------------------------------------------------------------------------|------|
| Q6Z493     | Protein DETOXIFICATION OS= <i>Oryza sativa</i> subsp. <i>japonica</i><br>GN=Os07g0502200 PE=3 SV=1                                                   | 1.92 |
| Q7XXQ8     | Os06g0232000 protein OS= <i>Oryza sativa</i> subsp. <i>japonica</i><br>GN=Os06g0232000 PE=2 SV=1                                                     | 1.91 |
| Q6YW53     | CASP-like protein 2D1 OS= <i>Oryza sativa</i> subsp. <i>japonica</i><br>GN=Os02g0219900 PE=2 SV=1                                                    | 1.89 |
| Q7XEL9     | Chitinase 1, putative, expressed OS= <i>Oryza sativa</i> subsp. <i>japonica</i><br>GN=Os10g0416800 PE=2 SV=1                                         | 1.88 |
| Q656J2     | Reticulon-like protein OS= <i>Oryza sativa</i> subsp. <i>japonica</i><br>GN=Os06g0503400 PE=2 SV=1                                                   | 1.88 |
| Q10PW8     | DnaK protein, expressed OS= <i>Oryza sativa</i> subsp. <i>japonica</i><br>GN=Os03g0218500 PE=2 SV=1                                                  | 1.88 |
| Q6Z563     | Os08g0412800 protein OS= <i>Oryza sativa</i> subsp. <i>japonica</i><br>GN=Os08g0412800 PE=2 SV=1                                                     | 1.87 |
| Q2QNV2     | Fiber protein Fb19, putative, expressed OS= <i>Oryza sativa</i> subsp. <i>japonica</i> GN=LOC_Os12g36640 PE=2 SV=1                                   | 1.86 |
| Q0JIL1     | Probable nucleoredoxin 2 OS= <i>Oryza sativa</i> subsp. <i>japonica</i><br>GN=Os01g0794400 PE=2 SV=1                                                 | 1.85 |
| Q67WJ2     | ATP-dependent zinc metalloprotease FTSH 6, chloroplastic<br>OS= <i>Oryza sativa</i> subsp. <i>japonica</i> GN=FTSH6 PE=3 SV=1                        | 1.85 |
| Q0DI48     | Thioredoxin-like fold domain-containing protein MRL7L homolog,<br>chloroplastic OS= <i>Oryza sativa</i> subsp. <i>japonica</i> GN=MRL7L PE=2<br>SV=1 | 1.84 |
| A0A0P0VVF7 | Os03g0248200 protein (Fragment) OS= <i>Oryza sativa</i> subsp. <i>japonica</i><br>GN=Os03g0248200 PE=3 SV=1                                          | 1.84 |
| Q10LP5     | Sucrose synthase 4 OS= <i>Oryza sativa</i> subsp. <i>japonica</i> GN=SUS4 PE=2<br>SV=1                                                               | 1.83 |
| A0A0P0V4A6 | Os01g0571166 protein OS= <i>Oryza sativa</i> subsp. <i>japonica</i><br>GN=Os01g0571166 PE=4 SV=1                                                     | 1.83 |
| Q7XXD3     | OSJNBa0039G19.10 protein OS= <i>Oryza sativa</i> subsp. <i>japonica</i><br>GN=Os04g0175600 PE=2 SV=2                                                 | 1.83 |
| Q5VRJ8     | Peroxisomal membrane protein 11-5 OS= <i>Oryza sativa</i> subsp. <i>japonica</i> GN=PEX11-5 PE=2 SV=1                                                | 1.82 |
| A0A0P0WLH4 | Os05g0364600 protein (Fragment) OS= <i>Oryza sativa</i> subsp. <i>japonica</i><br>GN=Os05g0364600 PE=4 SV=1                                          | 1.82 |
| Q5ZBR8     | Os01g0795000 protein OS= <i>Oryza sativa</i> subsp. <i>japonica</i><br>GN=Os01g0795000 PE=4 SV=1                                                     | 1.80 |
| Q53K52     | Protein PEP-RELATED DEVELOPMENT ARRESTED 1 homolog,<br>chloroplastic OS= <i>Oryza sativa</i> subsp. <i>japonica</i> GN=Os11g0425300<br>PE=2 SV=1     | 1.80 |
| Q6F391     | Expressed protein OS= <i>Oryza sativa</i> subsp. <i>japonica</i><br>GN=OSJNBb0021G19.8 PE=2 SV=1                                                     | 1.79 |
| Q6ZFI9     | 60 kDa chaperonin beta subunit OS= <i>Oryza sativa</i> subsp. <i>japonica</i><br>GN=Os02g0102900 PE=2 SV=1                                           | 1.78 |
| Q5QMT0     | Beta-glucosidase 1 OS= <i>Oryza sativa</i> subsp. <i>japonica</i> GN=BGLU1<br>PE=2 SV=1                                                              | 1.77 |
| Q10PB0     | Expressed protein OS= <i>Oryza sativa</i> subsp. <i>japonica</i><br>GN=LOC_Os03g13750 PE=2 SV=1                                                      | 1.77 |
| Q7XUW5     | 23.2 kDa heat shock protein OS= <i>Oryza sativa</i> subsp. <i>japonica</i><br>GN=HSP23.2 PE=2 SV=2                                                   | 1.76 |

|            |                                                                                                                                                 |      |
|------------|-------------------------------------------------------------------------------------------------------------------------------------------------|------|
| Q338P6     | Os10g0389200 protein OS= <i>Oryza sativa</i> subsp. <i>japonica</i><br>GN=Os10g0389200 PE=2 SV=1                                                | 1.75 |
| Q60ER3     | Os05g0393400 protein OS= <i>Oryza sativa</i> subsp. <i>japonica</i><br>GN=Os05g0393400 PE=2 SV=1                                                | 1.74 |
| A0A0P0W7K1 | Glycerol-3-phosphate dehydrogenase OS= <i>Oryza sativa</i> subsp. <i>japonica</i> GN=Os04g0225001 PE=3 SV=1                                     | 1.73 |
| Q6Z7K5     | Metal tolerance protein 3 OS= <i>Oryza sativa</i> subsp. <i>japonica</i><br>GN=MTP3 PE=2 SV=1                                                   | 1.73 |
| Q2QNQ6     | Expressed protein OS= <i>Oryza sativa</i> subsp. <i>japonica</i><br>GN=Os12g0557400 PE=2 SV=1                                                   | 1.72 |
| Q75IC7     | Secretory carrier-associated membrane protein 4 OS= <i>Oryza sativa</i> subsp. <i>japonica</i> GN=SCAMP4 PE=2 SV=1                              | 1.72 |
| Q656E2     | Endoribonuclease E-like protein OS= <i>Oryza sativa</i> subsp. <i>japonica</i><br>GN=P0552C05.41-1 PE=4 SV=1                                    | 1.71 |
| Q8LNZ3     | UDP-glucose 4-epimerase 1 OS= <i>Oryza sativa</i> subsp. <i>japonica</i><br>GN=UGE-1 PE=2 SV=1                                                  | 1.71 |
| Q10SR3     | 70 kDa heat shock protein OS= <i>Oryza sativa</i> subsp. <i>japonica</i><br>GN=Os03g0113700 PE=2 SV=1                                           | 1.71 |
| Q852G4     | EF hand family protein, expressed OS= <i>Oryza sativa</i> subsp. <i>japonica</i><br>GN=Os03g0411300 PE=2 SV=1                                   | 1.70 |
| Q5QNJ0     | Os01g0214600 protein OS= <i>Oryza sativa</i> subsp. <i>japonica</i><br>GN=Os01g0214600 PE=4 SV=1                                                | 1.70 |
| Q53JF7     | ABA/WDS induced protein, expressed OS= <i>Oryza sativa</i> subsp. <i>japonica</i> GN=Os11g0167800 PE=2 SV=1                                     | 1.70 |
| Q7FAS1     | Peroxisomal (S)-2-hydroxy-acid oxidase GLO3 OS= <i>Oryza sativa</i> subsp. <i>japonica</i> GN=GLO3 PE=2 SV=1                                    | 1.70 |
| Q67VZ1     | Annexin OS= <i>Oryza sativa</i> subsp. <i>japonica</i> GN=Os06g0221200 PE=2 SV=1                                                                | 1.70 |
| Q7XIV4     | Alpha-galactosidase OS= <i>Oryza sativa</i> subsp. <i>japonica</i><br>GN=Os07g0679300 PE=2 SV=1                                                 | 1.70 |
| Q6YSB2     | Glutamate decarboxylase OS= <i>Oryza sativa</i> subsp. <i>japonica</i><br>GN=P0104B02.16-2 PE=2 SV=1                                            | 1.69 |
| Q6ATF8     | Os05g0272900 protein OS= <i>Oryza sativa</i> subsp. <i>japonica</i><br>GN=Os05g0272900 PE=2 SV=1                                                | 1.69 |
| Q8H367     | Os07g0413800 protein OS= <i>Oryza sativa</i> subsp. <i>japonica</i><br>GN=Os07g0413800 PE=2 SV=1                                                | 1.69 |
| Q0DCI1     | Pyrophosphate--fructose 6-phosphate 1-phosphotransferase subunit alpha OS= <i>Oryza sativa</i> subsp. <i>japonica</i> GN=Os06g0326400 PE=2 SV=1 | 1.68 |
| Q75L18     | Os05g0112800 protein OS= <i>Oryza sativa</i> subsp. <i>japonica</i><br>GN=Os05g0112800 PE=2 SV=1                                                | 1.68 |
| Q7XW88     | OSJNBb0043H09.9 protein OS= <i>Oryza sativa</i> subsp. <i>japonica</i><br>GN=Os04g0244400 PE=2 SV=2                                             | 1.68 |
| Q75LD9     | Os03g0843300 protein OS= <i>Oryza sativa</i> subsp. <i>japonica</i><br>GN=OSJNBa0032G11.5 PE=2 SV=1                                             | 1.68 |
| Q5ZDL5     | Os01g0147700 protein OS= <i>Oryza sativa</i> subsp. <i>japonica</i><br>GN=Os01g0147700 PE=4 SV=1                                                | 1.68 |
| Q7XVC0     | OSJNBa0072D21.10 protein OS= <i>Oryza sativa</i> subsp. <i>japonica</i><br>GN=Os04g0382300 PE=2 SV=2                                            | 1.67 |



|            |                                                                                                                                          |      |
|------------|------------------------------------------------------------------------------------------------------------------------------------------|------|
| Q10PD0     | Purple acid phosphatase OS= <i>Oryza sativa</i> subsp. <i>japonica</i><br>GN=LOC_Os03g13540 PE=2 SV=1                                    | 1.66 |
| Q6H611     | Succinate dehydrogenase subunit 7, mitochondrial OS= <i>Oryza sativa</i> subsp. <i>japonica</i> GN=SDH7 PE=1 SV=1                        | 1.66 |
| Q5N770     | Os01g0813900 protein OS= <i>Oryza sativa</i> subsp. <i>japonica</i><br>GN=Os01g0813900 PE=4 SV=1                                         | 1.66 |
| A0A0N7KFB0 | Os02g0485000 protein (Fragment) OS= <i>Oryza sativa</i> subsp. <i>japonica</i><br>GN=Os02g0485000 PE=4 SV=1                              | 1.65 |
| Q5ZAV7     | Os01g0783500 protein OS= <i>Oryza sativa</i> subsp. <i>japonica</i><br>GN=Os01g0783500 PE=2 SV=1                                         | 1.65 |
| Q6YVX5     | Chloride channel protein OS= <i>Oryza sativa</i> subsp. <i>japonica</i><br>GN=Os02g0558100 PE=3 SV=1                                     | 1.65 |
| Q5JJV9     | Os01g0965400 protein OS= <i>Oryza sativa</i> subsp. <i>japonica</i><br>GN=Os01g0965400 PE=2 SV=1                                         | 1.64 |
| Q5QL78     | Os01g0524700 protein OS= <i>Oryza sativa</i> subsp. <i>japonica</i><br>GN=Os01g0524700 PE=2 SV=1                                         | 1.64 |
| Q2QN15     | Early-responsive to dehydration protein, putative, expressed<br>OS= <i>Oryza sativa</i> subsp. <i>japonica</i> GN=Os12g0582800 PE=4 SV=1 | 1.64 |
| Q6AUV3     | Os03g0430000 protein OS= <i>Oryza sativa</i> subsp. <i>japonica</i><br>GN=OSJNBa0091B22.9 PE=2 SV=1                                      | 1.64 |
| A0A0P0VQF9 | Os02g0783625 protein OS= <i>Oryza sativa</i> subsp. <i>japonica</i><br>GN=Os02g0783625 PE=4 SV=1                                         | 1.63 |
| Q0JD56     | Os04g0430200 protein OS= <i>Oryza sativa</i> subsp. <i>japonica</i><br>GN=Os04g0430200 PE=2 SV=1                                         | 1.63 |
| P0C5D6     | Serine/threonine-protein kinase SAPK3 OS= <i>Oryza sativa</i> subsp. <i>japonica</i> GN=SAPK3 PE=1 SV=1                                  | 1.63 |
| A0A0P0XAA0 | Os07g0671800 protein (Fragment) OS= <i>Oryza sativa</i> subsp. <i>japonica</i><br>GN=Os07g0671800 PE=4 SV=1                              | 1.63 |
| O04226     | Delta-1-pyrroline-5-carboxylate synthase 1 OS= <i>Oryza sativa</i> subsp. <i>japonica</i> GN=P5CS1 PE=2 SV=2                             | 1.63 |
| Q94DD0     | Os01g0859200 protein OS= <i>Oryza sativa</i> subsp. <i>japonica</i><br>GN=Os01g0859200 PE=2 SV=1                                         | 1.63 |
| Q7XR60     | Methylthioribose kinase 2 OS= <i>Oryza sativa</i> subsp. <i>japonica</i><br>GN=MTK2 PE=2 SV=1                                            | 1.62 |
| C7J056     | Os03g0859600 protein (Fragment) OS= <i>Oryza sativa</i> subsp. <i>japonica</i><br>GN=Os03g0859600 PE=3 SV=1                              | 1.62 |
| Q8S2H5     | Purple acid phosphatase OS= <i>Oryza sativa</i> subsp. <i>japonica</i><br>GN=P0003D09.8-1 PE=2 SV=1                                      | 1.62 |
| Q6Z3Y9     | Phosphoinositide phospholipase C OS= <i>Oryza sativa</i> subsp. <i>japonica</i><br>GN=Os07g0694000 PE=2 SV=1                             | 1.62 |
| Q337M4     | Os10g0463800 protein OS= <i>Oryza sativa</i> subsp. <i>japonica</i><br>GN=Os10g0463800 PE=2 SV=1                                         | 1.61 |
| B9F3B6     | Succinate-semialdehyde dehydrogenase, mitochondrial OS= <i>Oryza sativa</i> subsp. <i>japonica</i> GN=ALDH5F1 PE=3 SV=1                  | 1.61 |
| Q69XR3     | Alpha/beta hydrolase-fold family protein OS= <i>Oryza sativa</i> subsp. <i>japonica</i> GN=P0526E12.28-1 PE=2 SV=1                       | 1.61 |
| Q10PW2     | Tubulin alpha chain OS= <i>Oryza sativa</i> subsp. <i>japonica</i> GN=TubA PE=2 SV=1                                                     | 1.61 |

|            |                                                                                                                                       |      |
|------------|---------------------------------------------------------------------------------------------------------------------------------------|------|
| Q6Z312     | bZIP transcription factor 23 OS= <i>Oryza sativa</i> subsp. <i>japonica</i><br>GN=BZIP23 PE=2 SV=1                                    | 1.61 |
| Q5Z7I5     | Os06g0548200 protein OS= <i>Oryza sativa</i> subsp. <i>japonica</i><br>GN=Os06g0548200 PE=3 SV=1                                      | 1.61 |
| Q8RU95     | 4-coumarate--CoA ligase-like 6 OS= <i>Oryza sativa</i> subsp. <i>japonica</i><br>GN=4CLL6 PE=2 SV=2                                   | 1.60 |
| Q5ZAV6     | Os01g0783600 protein OS= <i>Oryza sativa</i> subsp. <i>japonica</i><br>GN=Os01g0783600 PE=2 SV=1                                      | 1.60 |
| Q5VRH4     | Homogentisate 1,2-dioxygenase OS= <i>Oryza sativa</i> subsp. <i>japonica</i><br>GN=HGO PE=2 SV=1                                      | 1.59 |
| Q6ZHI5     | Pentatricopeptide repeat-containing protein OTP51, chloroplastic<br>OS= <i>Oryza sativa</i> subsp. <i>japonica</i> GN=OTP51 PE=3 SV=1 | 1.59 |
| Q5NA77     | C2 domain-containing protein-like OS= <i>Oryza sativa</i> subsp. <i>japonica</i><br>GN=Os01g0242600 PE=2 SV=1                         | 1.59 |
| Q69LD9     | Os07g0169600 protein OS= <i>Oryza sativa</i> subsp. <i>japonica</i><br>GN=Os07g0169600 PE=2 SV=1                                      | 1.59 |
| Q6Z244     | Os08g0480200 protein OS= <i>Oryza sativa</i> subsp. <i>japonica</i><br>GN=Os08g0480200 PE=2 SV=1                                      | 1.58 |
| Q762A5     | BRI1-KD interacting protein 109 OS= <i>Oryza sativa</i> subsp. <i>japonica</i><br>GN=bip109 PE=2 SV=1                                 | 1.58 |
| Q8S7M7     | Plant intracellular Ras-group-related LRR protein 5 OS= <i>Oryza sativa</i><br>subsp. <i>japonica</i> GN=IRL5 PE=2 SV=1               | 1.58 |
| Q2QXG8     | Os12g0157200 protein OS= <i>Oryza sativa</i> subsp. <i>japonica</i><br>GN=LOC_Os12g06100 PE=4 SV=1                                    | 1.58 |
| Q0JEP5     | Os04g0224900 protein (Fragment) OS= <i>Oryza sativa</i> subsp. <i>japonica</i><br>GN=Os04g0224900 PE=4 SV=1                           | 1.57 |
| Q6Z6A7     | Annexin OS= <i>Oryza sativa</i> subsp. <i>japonica</i> GN=Os02g0753800 PE=3<br>SV=1                                                   | 1.57 |
| Q6H7M1     | Fumarylacetoacetase OS= <i>Oryza sativa</i> subsp. <i>japonica</i> GN=FAH<br>PE=2 SV=1                                                | 1.57 |
| Q6ZBK6     | Os08g0519400 protein OS= <i>Oryza sativa</i> subsp. <i>japonica</i><br>GN=Os08g0519400 PE=4 SV=1                                      | 1.56 |
| Q5QLQ5     | Os01g0667200 protein OS= <i>Oryza sativa</i> subsp. <i>japonica</i><br>GN=Os01g0667200 PE=2 SV=1                                      | 1.56 |
| A0A0P0WMW0 | Os05g0432700 protein (Fragment) OS= <i>Oryza sativa</i> subsp. <i>japonica</i><br>GN=Os05g0432700 PE=4 SV=1                           | 1.56 |
| Q65XA0     | Probable glutathione S-transferase DHAR1, cytosolic OS= <i>Oryza</i><br><i>sativa</i> subsp. <i>japonica</i> GN=DHAR1 PE=1 SV=1       | 1.56 |
| B9FRA2     | Os06g0127500 protein OS= <i>Oryza sativa</i> subsp. <i>japonica</i><br>GN=Os06g0127500 PE=4 SV=1                                      | 1.56 |
| Q7F7I7     | GTP-binding nuclear protein Ran-1 OS= <i>Oryza sativa</i> subsp. <i>japonica</i><br>GN=RAN1 PE=2 SV=1                                 | 1.56 |
| Q75IM9     | Isovaleryl-CoA dehydrogenase, mitochondrial OS= <i>Oryza sativa</i><br>subsp. <i>japonica</i> GN=Os05g0125500 PE=2 SV=2               | 1.56 |
| Q69P84     | Aldehyde dehydrogenase OS= <i>Oryza sativa</i> subsp. <i>japonica</i><br>GN=OJ1344_B01.27-1 PE=2 SV=1                                 | 1.55 |
| A0A0P0UYD8 | Os01g0155400 protein (Fragment) OS= <i>Oryza sativa</i> subsp. <i>japonica</i><br>GN=Os01g0155400 PE=4 SV=1                           | 1.55 |



|            |                                                                                                                      |      |
|------------|----------------------------------------------------------------------------------------------------------------------|------|
| A0A0P0UYG1 | Os01g0155500 protein (Fragment) OS=Oryza sativa subsp. japonica<br>GN=Os01g0155500 PE=3 SV=1                         | 1.55 |
| Q5W6X4     | Os05g0316200 protein OS=Oryza sativa subsp. japonica<br>GN=Os05g0316200 PE=2 SV=1                                    | 1.55 |
| Q2R1J1     | ABC transporter family protein, expressed OS=Oryza sativa subsp.<br>japonica GN=Os11g0603200 PE=2 SV=1               | 1.55 |
| Q2QXL3     | ACT domain-containing protein, putative, expressed OS=Oryza<br>sativa subsp. japonica GN=Os12g0152700 PE=2 SV=1      | 1.55 |
| Q94E65     | Os01g0172800 protein OS=Oryza sativa subsp. japonica<br>GN=Os01g0172800 PE=2 SV=1                                    | 1.55 |
| Q5Z4C9     | Os06g0306600 protein OS=Oryza sativa subsp. japonica<br>GN=Os06g0306600 PE=2 SV=1                                    | 1.55 |
| Q2QTY6     | Lysosomal Cystine Transporter family protein, expressed OS=Oryza<br>sativa subsp. japonica GN=Os12g0278700 PE=2 SV=2 | 1.55 |
| Q10MJ3     | Os03g0306900 protein OS=Oryza sativa subsp. japonica<br>GN=Os03g0306900 PE=2 SV=1                                    | 1.54 |
| Q6L4X5     | Thioredoxin OS=Oryza sativa subsp. japonica GN=Os05g0508500<br>PE=3 SV=1                                             | 1.54 |
| Q6ZCF3     | Os08g0205400 protein OS=Oryza sativa subsp. japonica<br>GN=Os08g0205400 PE=2 SV=1                                    | 1.53 |
| B9FCW0     | Os04g0652700 protein OS=Oryza sativa subsp. japonica<br>GN=Os04g0652700 PE=4 SV=1                                    | 1.53 |
| Q75M67     | Expressed protein OS=Oryza sativa subsp. japonica<br>GN=Os03g0381300 PE=4 SV=1                                       | 1.53 |
| Q7XRE7     | OSJNBa0006M15.20 protein OS=Oryza sativa subsp. japonica<br>GN=OSJNBa0036B21.4 PE=2 SV=2                             | 1.53 |
| Q5Z9P6     | Os06g0715500 protein OS=Oryza sativa subsp. japonica<br>GN=Os06g0715500 PE=2 SV=1                                    | 1.52 |
| Q2QME6     | Homocysteine S-methyltransferase 3 OS=Oryza sativa subsp.<br>japonica GN=Os12g0607000 PE=2 SV=2                      | 1.52 |
| Q948T6     | Lactoylglutathione lyase OS=Oryza sativa subsp. japonica GN=GLYI-<br>11 PE=1 SV=2                                    | 1.52 |
| Q0JNR2     | Cysteine proteinase inhibitor 12 OS=Oryza sativa subsp. japonica<br>GN=Os01g0270100 PE=2 SV=1                        | 1.51 |
| Q69LD2     | Os07g0170100 protein OS=Oryza sativa subsp. japonica<br>GN=Os07g0170100 PE=2 SV=1                                    | 1.51 |
| Q6H7E4     | Thioredoxin M1, chloroplastic OS=Oryza sativa subsp. japonica<br>GN=Os02g0639900 PE=2 SV=1                           | 1.51 |
| Q6L4H1     | Os05g0550300 protein OS=Oryza sativa subsp. japonica<br>GN=P0560C03.5 PE=2 SV=1                                      | 1.51 |
| A3AWZ0     | Os04g0593400 protein OS=Oryza sativa subsp. japonica<br>GN=Os04g0593400 PE=4 SV=1                                    | 1.51 |
| Q6H7R1     | Os02g0643000 protein OS=Oryza sativa subsp. japonica<br>GN=Os02g0643000 PE=2 SV=1                                    | 1.51 |
| Q6K3E9     | F-box family protein-like OS=Oryza sativa subsp. japonica<br>GN=Os02g0813350 PE=2 SV=1                               | 1.51 |
| Q75LJ3     | Electron transfer flavoprotein subunit alpha, mitochondrial<br>OS=Oryza sativa subsp. japonica GN=ETFA PE=2 SV=1     | 1.50 |

|            |                                                                                                             |      |
|------------|-------------------------------------------------------------------------------------------------------------|------|
| Q9FRA7     | REF/SRPP-like protein Os05g0151300/LOC_Os05g05940 OS=Oryza sativa subsp. japonica GN=Os05g0151300 PE=2 SV=2 | 1.50 |
| Q6H475     | Os02g0631000 protein OS=Oryza sativa subsp. japonica GN=Os02g0631000 PE=2 SV=1                              | 1.50 |
| A0A0P0UZ39 | Os01g0190000 protein OS=Oryza sativa subsp. japonica GN=Os01g0190000 PE=4 SV=1                              | 1.50 |

| IAC_ S4 vs C0_ Proteins decreased in abundance |                                                            |      |       |
|------------------------------------------------|------------------------------------------------------------|------|-------|
| Accession                                      | Description                                                | FC   |       |
| Q6K209                                         | Os02g0629800 protein OS=Oryza sativa subsp. japonica       | 0.46 | -2.18 |
|                                                | GN=Os02g0629800 PE=3 SV=1                                  |      |       |
| Q7XUY5                                         | OSJNBb0048E02.12 protein OS=Oryza sativa subsp. japonica   | 0.49 | -2.06 |
|                                                | GN=Os04g0465600 PE=2 SV=1                                  |      |       |
| Q5NAM3                                         | Branched-chain amino acid aminotransferase-like OS=Oryza   | 0.49 | -2.05 |
|                                                | sativa subsp. japonica GN=Os01g0238500 PE=4 SV=1           |      |       |
| P31924                                         | Sucrose synthase 1 OS=Oryza sativa subsp. japonica GN=SUS1 | 0.51 | -1.97 |
|                                                | PE=1 SV=1                                                  |      |       |
| Q6K826                                         | Os02g0781400 protein OS=Oryza sativa subsp. japonica       | 0.52 | -1.93 |
|                                                | GN=OJ1369_G08.10-1 PE=2 SV=1                               |      |       |
| B7EY20                                         | Os05g0456300 protein OS=Oryza sativa subsp. japonica       | 0.54 | -1.85 |
|                                                | GN=Os05g0456300 PE=2 SV=1                                  |      |       |
| Q0D5I5                                         | Os07g0558300 protein OS=Oryza sativa subsp. japonica       | 0.57 | -1.75 |
|                                                | GN=Os07g0558300 PE=2 SV=1                                  |      |       |
| Q8L562                                         | Hydrolase-like OS=Oryza sativa subsp. japonica             | 0.58 | -1.73 |
|                                                | GN=Os01g0595600 PE=2 SV=1                                  |      |       |
| Q6H6D2                                         |                                                            | 0.59 | -1.71 |
|                                                | Porphobilinogen deaminase, chloroplastic OS=Oryza sativa   |      |       |
|                                                | subsp. japonica GN=HEMC PE=2 SV=1                          |      |       |
| Q6ZLK8                                         | Os07g0134000 protein OS=Oryza sativa subsp. japonica       | 0.59 | -1.70 |
|                                                | GN=OJ1118_D07.26-1 PE=2 SV=1                               |      |       |
| Q7XI92                                         | Os07g0580900 protein OS=Oryza sativa subsp. japonica       | 0.59 | -1.68 |
|                                                | GN=Os07g0580900 PE=1 SV=1                                  |      |       |
| Q9LRE9                                         | Cytosolic aldehyde dehydrogenase OS=Oryza sativa subsp.    | 0.60 | -1.67 |
|                                                | japonica GN=ALDH1a PE=2 SV=1                               |      |       |
| Q7F9Y6                                         | OSJNBa0086O06.22 protein OS=Oryza sativa subsp. japonica   | 0.61 | -1.64 |
|                                                | GN=Os04g0591000 PE=2 SV=1                                  |      |       |
| Q0DTF5                                         | Os03g0251000 protein OS=Oryza sativa subsp. japonica       | 0.63 | -1.59 |
|                                                | GN=Os03g0251000 PE=4 SV=1                                  |      |       |
| Q7XS58                                         | Cysteine synthase OS=Oryza sativa subsp. japonica          | 0.63 | -1.59 |
|                                                | GN=Os04g0165700 PE=2 SV=2                                  |      |       |
| Q6ATB2                                         | Probable GTP diphosphokinase CRSH2, chloroplastic OS=Oryza | 0.63 | -1.58 |
|                                                | sativa subsp. japonica GN=CRSH2 PE=2 SV=1                  |      |       |
| Q6ET88                                         | Os02g0668100 protein OS=Oryza sativa subsp. japonica       | 0.63 | -1.58 |
|                                                | GN=Os02g0668100 PE=1 SV=1                                  |      |       |
| Q6ZBZ8                                         | Os08g0459300 protein OS=Oryza sativa subsp. japonica       | 0.64 | -1.57 |
|                                                | GN=Os08g0459300 PE=2 SV=1                                  |      |       |
| Q945W2                                         | Glutathione S-transferase GSTU6, putative, expressed       | 0.64 | -1.55 |
|                                                | OS=Oryza sativa subsp. japonica GN=Os10g0529300 PE=2       |      |       |
|                                                | SV=1                                                       |      |       |
| B7FA34                                         | Os05g0548900 protein OS=Oryza sativa subsp. japonica       | 0.64 | -1.55 |
|                                                | GN=Os05g0548900 PE=2 SV=1                                  |      |       |
| Q0JGA3                                         | Os01g0934400 protein (Fragment) OS=Oryza sativa subsp.     | 0.65 | -1.55 |
|                                                | japonica GN=Os01g0934400 PE=4 SV=1                         |      |       |

|           |                                                                                                                          |      |       |
|-----------|--------------------------------------------------------------------------------------------------------------------------|------|-------|
| Q10LR9    | Uroporphyrinogen decarboxylase 2, chloroplastic OS= <i>Oryza sativa</i> subsp. <i>japonica</i> GN=Os03g0337600 PE=3 SV=1 | 0.65 | -1.53 |
| P12139    | 50S ribosomal protein L20, chloroplastic OS= <i>Oryza sativa</i> subsp. <i>japonica</i> GN=rpl20 PE=3 SV=3               | 0.66 | -1.53 |
| Q6ZGU9    | Expansin-A5 OS= <i>Oryza sativa</i> subsp. <i>japonica</i> GN=EXPA5 PE=2 SV=1                                            | 0.66 | -1.52 |
| Q6Z6Y1    | Os02g0130100 protein OS= <i>Oryza sativa</i> subsp. <i>japonica</i> GN=Os02g0130100 PE=2 SV=1                            | 0.66 | -1.51 |
| A0A0P0Y8L | Os12g0263000 protein (Fragment) OS= <i>Oryza sativa</i> subsp. <i>japonica</i> GN=Os12g0263000 PE=4 SV=1                 | 0.66 | -1.51 |
| Q6ASX7    | Glycine-rich RNA binding protein OS= <i>Oryza sativa</i> subsp. <i>japonica</i> GN=Os03g0670700 PE=2 SV=1                | 0.66 | -1.51 |

| NIP_ S2 vs C0_ Proteins increased in abundance |                                                                                                                                        |      |
|------------------------------------------------|----------------------------------------------------------------------------------------------------------------------------------------|------|
| Accession                                      | Description                                                                                                                            | FC   |
| Q6Z6M4                                         | Isocitrate lyase OS=Oryza sativa subsp. japonica GN=ICL PE=1 SV=1                                                                      | 6.27 |
| P0C5A4                                         | Late embryogenesis abundant protein 19 OS=Oryza sativa subsp. japonica GN=LEA19 PE=2 SV=1                                              | 5.87 |
| Q8H5Y7                                         | Os07g0611400 protein OS=Oryza sativa subsp. japonica GN=OJ1003_H02.109 PE=4 SV=1                                                       | 5.74 |
| Q8S702                                         | Glutathione S-transferase GSTU6, putative, expressed OS=Oryza sativa subsp. japonica GN=LOC_Os10g38470 PE=2 SV=1                       | 5.08 |
| Q7XUG1                                         | Malate synthase OS=Oryza sativa subsp. japonica GN=MS PE=2 SV=1                                                                        | 4.73 |
| Q2R1V2                                         | Barwin, putative, expressed OS=Oryza sativa subsp. japonica GN=LOC_Os11g37950 PE=2 SV=1                                                | 4.41 |
| Q2QLS9                                         | Os12g0629700 protein OS=Oryza sativa subsp. japonica GN=LOC_Os12g43430 PE=2 SV=1                                                       | 4.31 |
| Q7XBA6                                         | Non-specific lipid-transfer protein OS=Oryza sativa subsp. japonica GN=Os11g0115400 PE=2 SV=1                                          | 3.92 |
| Q8H4P7                                         | Os07g0147500 protein OS=Oryza sativa subsp. japonica GN=OJ1470_H06.117 PE=2 SV=1                                                       | 3.90 |
| Q84Q77                                         | 17.9 kDa class I heat shock protein OS=Oryza sativa subsp. japonica GN=HSP17.9A PE=1 SV=1                                              | 3.83 |
| Q5VP66                                         | Os01g0644000 protein OS=Oryza sativa subsp. japonica GN=Os01g0644000 PE=2 SV=1                                                         | 3.82 |
| Q306J3                                         | Dirigent protein OS=Oryza sativa subsp. japonica GN=JAC1 PE=2 SV=1                                                                     | 3.72 |
| A0A0P0WA                                       | Os04g0415800 protein OS=Oryza sativa subsp. japonica GN=Os04g0415800 PE=4 SV=1                                                         | 3.67 |
| A0A0P0VQF                                      | Os02g0783625 protein OS=Oryza sativa subsp. japonica GN=Os02g0783625 PE=4 SV=1                                                         | 3.66 |
| Q84TB6                                         | Actin-depolymerizing factor 3 OS=Oryza sativa subsp. japonica GN=ADF3 PE=1 SV=1                                                        | 3.62 |
| Q9FWU4                                         | Os10g0491000 protein OS=Oryza sativa subsp. japonica GN=LOC_Os10g34930 PE=2 SV=1                                                       | 3.55 |
| Q42993                                         | Chitinase 1 OS=Oryza sativa subsp. japonica GN=Cht1 PE=2 SV=1                                                                          | 3.50 |
| A0A0P0XVP                                      | Alpha-galactosidase OS=Oryza sativa subsp. japonica GN=Os10g0492900 PE=3 SV=1                                                          | 3.46 |
| Q0DPU1                                         | Os03g0663500 protein (Fragment) OS=Oryza sativa subsp. japonica GN=Os03g0663500 PE=4 SV=1                                              | 3.39 |
| Q94LP4                                         | (RAP Annotation release2) 2OG-Fe(II) oxygenase domain containing protein OS=Oryza sativa subsp. japonica GN=OSJNBa0042H09.28 PE=2 SV=1 | 3.38 |
| Q0DHF7                                         | Os05g0468800 protein OS=Oryza sativa subsp. japonica GN=Os05g0468800 PE=4 SV=1                                                         | 3.38 |

|           |                                                                                                                                |      |
|-----------|--------------------------------------------------------------------------------------------------------------------------------|------|
| Q6ESR4    | Dehydrin DHN1 OS= <i>Oryza sativa</i> subsp. <i>japonica</i> GN=DHN1 PE=2 SV=1                                                 | 3.34 |
|           | Os03g0661600 protein (Fragment) OS= <i>Oryza sativa</i> subsp. <i>japonica</i>                                                 |      |
| A0A0P0W1I | GN=Os03g0661600 PE=4 SV=1                                                                                                      | 3.34 |
|           | Acidic class III chitinase OsChib3a OS= <i>Oryza sativa</i> subsp. <i>japonica</i>                                             |      |
| O22080    | GN=Os01g0660200 PE=2 SV=2                                                                                                      | 3.30 |
|           | 33 kDa secretory protein, putative, expressed OS= <i>Oryza sativa</i> subsp. <i>japonica</i>                                   |      |
| Q10N98    | GN=Os03g0277600 PE=2 SV=1                                                                                                      | 3.28 |
|           | Os08g0412800 protein OS= <i>Oryza sativa</i> subsp. <i>japonica</i> GN=Os08g0412800                                            |      |
| Q6Z563    | PE=2 SV=1                                                                                                                      | 3.27 |
|           | 18.1 kDa class I heat shock protein OS= <i>Oryza sativa</i> subsp. <i>japonica</i>                                             |      |
| Q84Q72    | GN=HSP18.1 PE=2 SV=1                                                                                                           | 3.26 |
|           | Peroxidase OS= <i>Oryza sativa</i> subsp. <i>japonica</i> GN=OJ1167_G06.129 PE=3 SV=1                                          | 3.23 |
| Q7XIX0    | Os09g0467200 protein OS= <i>Oryza sativa</i> subsp. <i>japonica</i> GN=Os09g0467200                                            |      |
| Q93WY5    | PE=2 SV=1                                                                                                                      | 3.19 |
|           | Os07g0523400 protein OS= <i>Oryza sativa</i> subsp. <i>japonica</i> GN=Os07g0523400                                            |      |
| B7EHD5    | PE=2 SV=1                                                                                                                      | 3.16 |
|           | 16.9 kDa class I heat shock protein 1 OS= <i>Oryza sativa</i> subsp. <i>japonica</i>                                           |      |
| P27777    | GN=HSP16.9A PE=1 SV=1                                                                                                          | 3.06 |
|           | Os07g0539900 protein OS= <i>Oryza sativa</i> subsp. <i>japonica</i> GN=Os07g0539900                                            |      |
| Q0D5S1    | PE=2 SV=1                                                                                                                      | 3.04 |
|           | Os06g0323100 protein (Fragment) OS= <i>Oryza sativa</i> subsp. <i>japonica</i>                                                 |      |
| A0A0P0WW  | GN=Os06g0323100 PE=4 SV=1                                                                                                      | 3.03 |
|           | Os07g0290200 protein OS= <i>Oryza sativa</i> subsp. <i>japonica</i> GN=P0438G07.127                                            |      |
| Q8GSD8    | PE=2 SV=1                                                                                                                      | 2.97 |
|           | 18.0 kDa class II heat shock protein OS= <i>Oryza sativa</i> subsp. <i>japonica</i>                                            |      |
| Q5VRY1    | GN=HSP18.0 PE=2 SV=1                                                                                                           | 2.95 |
|           | Os03g0663400 protein OS= <i>Oryza sativa</i> subsp. <i>japonica</i> GN=Os03g0663400                                            |      |
| Q75GX3    | PE=2 SV=1                                                                                                                      | 2.94 |
|           | Mitochondrial import inner membrane translocase subunit                                                                        |      |
|           | Tim17/Tim22/Tim23 family protein, putative, expressed OS= <i>Oryza sativa</i> subsp. <i>japonica</i> GN=Os03g0305600 PE=2 SV=1 | 2.86 |
| Q10MK4    | Os07g0539100 protein OS= <i>Oryza sativa</i> subsp. <i>japonica</i> GN=Os07g0539100                                            |      |
| Q6YVU7    | PE=2 SV=1                                                                                                                      | 2.85 |
|           | Probable lipoxygenase 8, chloroplastic OS= <i>Oryza sativa</i> subsp. <i>japonica</i> GN=CM-LOX2 PE=2 SV=1                     | 2.82 |
| Q84YK8    |                                                                                                                                | 2.82 |
|           | Bowman-Birk type proteinase inhibitor A OS= <i>Oryza sativa</i> subsp. <i>japonica</i>                                         |      |
| A5HEI2    | GN=pinA PE=2 SV=1                                                                                                              | 2.82 |
|           | Os07g0120600 protein OS= <i>Oryza sativa</i> subsp. <i>japonica</i> GN=Os07g0120650                                            |      |
| A3BG40    | PE=4 SV=1                                                                                                                      | 2.80 |
|           | Thaumatococcus-like protein OS= <i>Oryza sativa</i> subsp. <i>japonica</i> GN=Os12g0628600                                     |      |
| P31110    | PE=1 SV=1                                                                                                                      | 2.78 |
|           | Os01g0940800 protein OS= <i>Oryza sativa</i> subsp. <i>japonica</i> GN=Os01g0940800                                            |      |
| Q8S9R1    | PE=2 SV=1                                                                                                                      | 2.74 |

|           |                                                                                                                           |      |
|-----------|---------------------------------------------------------------------------------------------------------------------------|------|
| Q8L4V6    | Glutathione S-transferase GSTU6, putative, expressed OS=Oryza sativa subsp. japonica GN=LOC_Os10g38780 PE=2 SV=1          | 2.70 |
| Q653Y0    | Os06g0681200 protein OS=Oryza sativa subsp. japonica GN=Os06g0681200 PE=2 SV=1                                            | 2.68 |
| Q8LNZ3    | UDP-glucose 4-epimerase 1 OS=Oryza sativa subsp. japonica GN=UGE-1 PE=2 SV=1                                              | 2.67 |
| Q7XDQ8    | NAD dependent epimerase/dehydratase family protein, expressed OS=Oryza sativa subsp. japonica GN=LOC_Os10g31780 PE=4 SV=1 | 2.67 |
| Q0JIK5    | Os01g0795200 protein OS=Oryza sativa subsp. japonica GN=Os01g0795200 PE=3 SV=1                                            | 2.67 |
| Q7F1U0    | Peroxidase OS=Oryza sativa subsp. japonica GN=OJ1167_G06.125 PE=2 SV=1                                                    | 2.65 |
| Q652V8    | 16.0 kDa heat shock protein, peroxisomal OS=Oryza sativa subsp. japonica GN=HSP16.0 PE=2 SV=1                             | 2.60 |
| Q7F164    | Os01g0940700 protein OS=Oryza sativa subsp. japonica GN=P0432C03.10-1 PE=2 SV=1                                           | 2.60 |
| A0A0POV8H | Os01g0757900 protein OS=Oryza sativa subsp. japonica GN=Os01g0757900 PE=4 SV=1                                            | 2.55 |
| A0A0POW6  | Os04g0107900 protein (Fragment) OS=Oryza sativa subsp. japonica GN=Os04g0107900 PE=4 SV=1                                 | 2.55 |
| Q6ZLJ9    | Os07g0209100 protein OS=Oryza sativa subsp. japonica GN=Os07g0209100 PE=4 SV=1                                            | 2.54 |
| B7E9D7    | Os01g0124650 protein OS=Oryza sativa subsp. japonica GN=Os01g0124650 PE=2 SV=1                                            | 2.53 |
| Q0IZF1    | Os09g0572700 protein OS=Oryza sativa subsp. japonica GN=Os09g0572700 PE=2 SV=1                                            | 2.48 |
| Q2QNN5    | Lipoxygenase OS=Oryza sativa subsp. japonica GN=Os12g0559200 PE=3 SV=2                                                    | 2.48 |
| Q9LGB2    | Os01g0132000 protein OS=Oryza sativa subsp. japonica GN=Os01g0132000 PE=2 SV=1                                            | 2.48 |
| Q75T45    | Os12g0555000 protein OS=Oryza sativa subsp. japonica GN=RSOsPR10 PE=2 SV=1                                                | 2.47 |
| Q9FP25    | Os01g0303000 protein OS=Oryza sativa subsp. japonica GN=P0035H10.18 PE=2 SV=1                                             | 2.46 |
| Q851F9    | Probable zinc metalloprotease EGY3, chloroplastic OS=Oryza sativa subsp. japonica GN=EGY3 PE=2 SV=1                       | 2.45 |
| Q338P6    | Os10g0389200 protein OS=Oryza sativa subsp. japonica GN=Os10g0389200 PE=2 SV=1                                            | 2.45 |
| Q84J50    | 17.7 kDa class I heat shock protein OS=Oryza sativa subsp. japonica GN=HSP17.7 PE=2 SV=1                                  | 2.45 |
| Q0IQK9    | Non-specific lipid-transfer protein 1 OS=Oryza sativa subsp. japonica GN=LTP PE=1 SV=1                                    | 2.44 |
| Q10NA1    | Heat shock cognate 70 kDa protein, putative, expressed OS=Oryza sativa subsp. japonica GN=Os03g0277300 PE=3 SV=1          | 2.43 |
| Q337E2    | Expressed protein OS=Oryza sativa subsp. japonica GN=Os10g0505900 PE=4 SV=1                                               | 2.42 |

|           |                                                                                               |      |
|-----------|-----------------------------------------------------------------------------------------------|------|
| Q7X8R5    | Thioredoxin M2, chloroplastic OS=Oryza sativa subsp. japonica<br>GN=Os04g0530600 PE=2 SV=2    | 2.42 |
| Q94E74    | Os01g0511100 protein OS=Oryza sativa subsp. japonica GN=Os01g0511100<br>PE=2 SV=1             | 2.40 |
| B9FCZ7    | Os04g0663700 protein OS=Oryza sativa subsp. japonica GN=Os04g0663700<br>PE=4 SV=1             | 2.40 |
| Q0D840    | Thioredoxin H1 OS=Oryza sativa subsp. japonica GN=TRXH PE=1 SV=1                              | 2.37 |
| Q7F2P0    | Os01g0382000 protein OS=Oryza sativa subsp. japonica GN=Os01g0382000<br>PE=3 SV=1             | 2.35 |
| Q5ZCB1    | Os01g0124000 protein OS=Oryza sativa subsp. japonica GN=Os01g0124000<br>PE=2 SV=1             | 2.35 |
| Q6Z4I3    | Thioredoxin H2-1 OS=Oryza sativa subsp. japonica GN=Os07g0190800 PE=2<br>SV=1                 | 2.34 |
| Q2TN87    | Os04g0208200 protein OS=Oryza sativa subsp. japonica GN=Os04g0208200<br>PE=2 SV=1             | 2.33 |
| A0A0P0XGC | Os08g0425800 protein OS=Oryza sativa subsp. japonica GN=Os08g0425800<br>PE=4 SV=1             | 2.32 |
| P38419    | Lipoxygenase 7, chloroplastic OS=Oryza sativa subsp. japonica GN=CM-LOX1<br>PE=2 SV=2         | 2.32 |
| Q8S1C7    | Cytochrome P450 (CYP72C)-like OS=Oryza sativa subsp. japonica GN=CYP72A32<br>PE=2 SV=1        | 2.31 |
| Q10MJ5    | CP12, putative, expressed OS=Oryza sativa subsp. japonica<br>GN=LOC_Os03g19380 PE=2 SV=1      | 2.30 |
| Q7XEL9    | Chitinase 1, putative, expressed OS=Oryza sativa subsp. japonica<br>GN=Os10g0416800 PE=2 SV=1 | 2.29 |
| Q10S66    | Chitinase 11 OS=Oryza sativa subsp. japonica GN=Cht11 PE=2 SV=1                               | 2.27 |
| Q6K7E9    | 18.6 kDa class III heat shock protein OS=Oryza sativa subsp. japonica<br>GN=HSP18.6 PE=2 SV=1 | 2.26 |
| Q10K80    | Carboxypeptidase OS=Oryza sativa subsp. japonica GN=Os03g0393700 PE=3<br>SV=1                 | 2.25 |
| Q94JF2    | Late embryogenesis abundant protein 14 OS=Oryza sativa subsp. japonica<br>GN=LEA14 PE=2 SV=1  | 2.25 |
| Q5ZAV6    | Os01g0783600 protein OS=Oryza sativa subsp. japonica GN=Os01g0783600<br>PE=2 SV=1             | 2.24 |
| Q6YXZ3    | Os02g0139100 protein OS=Oryza sativa subsp. japonica GN=Os02g0139100<br>PE=2 SV=1             | 2.23 |
| Q7XSN6    | Germin-like protein 4-1 OS=Oryza sativa subsp. japonica GN=Os04g0617900<br>PE=2 SV=2          | 2.23 |
| Q8W3C9    | Os10g0101000 protein OS=Oryza sativa subsp. japonica GN=Os10g0101000<br>PE=4 SV=1             | 2.23 |



|           |                                                                                                                                                           |      |
|-----------|-----------------------------------------------------------------------------------------------------------------------------------------------------------|------|
| Q5VRH4    | Homogentisate 1,2-dioxygenase OS=Oryza sativa subsp. japonica GN=HGO<br>PE=2 SV=1                                                                         | 2.23 |
| Q5VRJ8    | Peroxisomal membrane protein 11-5 OS=Oryza sativa subsp. japonica<br>GN=PEX11-5 PE=2 SV=1                                                                 | 2.23 |
| Q6Z7V2    | 24.1 kDa heat shock protein, mitochondrial OS=Oryza sativa subsp. japonica<br>GN=HSP24.1 PE=2 SV=1                                                        | 2.22 |
| Q6ZFM7    | Os07g0582400 protein OS=Oryza sativa subsp. japonica GN=Os07g0582400<br>PE=3 SV=1                                                                         | 2.19 |
| Q851K1    | Germin-like protein 3-6 OS=Oryza sativa subsp. japonica GN=Os03g0694000<br>PE=2 SV=1                                                                      | 2.18 |
| Q0JK51    | Os01g0695800 protein (Fragment) OS=Oryza sativa subsp. japonica<br>GN=Os01g0695800 PE=4 SV=1                                                              | 2.17 |
| Q655T1    | Phosphoglycerate kinase OS=Oryza sativa subsp. japonica GN=Os06g0668200<br>PE=2 SV=1                                                                      | 2.17 |
| Q8W1L6    | Peroxisomal fatty acid beta-oxidation multifunctional protein OS=Oryza sativa<br>subsp. japonica GN=MFP PE=1 SV=2                                         | 2.16 |
| Q943K7    | 70 kDa heat shock protein OS=Oryza sativa subsp. japonica GN=Os01g0840100<br>PE=2 SV=1                                                                    | 2.16 |
| Q0JNL7    | Calmodulin-3 OS=Oryza sativa subsp. japonica GN=CAM3 PE=2 SV=1                                                                                            | 2.16 |
| Q9XFE4    | Peptidylprolyl isomerase OS=Oryza sativa subsp. japonica GN=Os04g0352400<br>PE=2 SV=2                                                                     | 2.13 |
| A0A0P0WAI | Os04g0423600 protein OS=Oryza sativa subsp. japonica GN=Os04g0423600<br>PE=4 SV=1                                                                         | 2.12 |
| A0A0P0VCV | Os01g0949750 protein (Fragment) OS=Oryza sativa subsp. japonica<br>GN=Os01g0949750 PE=4 SV=1                                                              | 2.11 |
| Q5SMV5    | Carboxypeptidase OS=Oryza sativa subsp. japonica GN=Os06g0186400 PE=2<br>SV=1                                                                             | 2.11 |
| O82807    | Ubiquinol oxidase 1a, mitochondrial OS=Oryza sativa subsp. japonica<br>GN=AOX1A PE=2 SV=1                                                                 | 2.10 |
| Q8S1G9    | Os01g0796400 protein OS=Oryza sativa subsp. japonica GN=P0699H05.27-1<br>PE=2 SV=1                                                                        | 2.10 |
| Q10LP5    | Sucrose synthase 4 OS=Oryza sativa subsp. japonica GN=SUS4 PE=2 SV=1<br>Os01g0910900 protein OS=Oryza sativa subsp. japonica GN=Os01g0910900<br>PE=2 SV=1 | 2.10 |
| Q5N7Y1    | Os02g0612900 protein OS=Oryza sativa subsp. japonica GN=Os02g0612900<br>PE=2 SV=1                                                                         | 2.08 |
| Q6K623    | Aldehyde dehydrogenase OS=Oryza sativa subsp. japonica GN=OJ1344_B01.27-<br>1 PE=2 SV=1                                                                   | 2.08 |
| Q69P84    | Os05g0160300 protein OS=Oryza sativa subsp. japonica GN=Os05g0160300<br>PE=2 SV=1                                                                         | 2.07 |
| Q6ATC1    | Probable aquaporin TIP1-2 OS=Oryza sativa subsp. japonica GN=TIP1-2 PE=2<br>SV=1                                                                          | 2.06 |
| Q94CS9    |                                                                                                                                                           | 2.05 |

|           |                                                                                                                                |      |
|-----------|--------------------------------------------------------------------------------------------------------------------------------|------|
| Q10QP0    | Os03g0189400 protein OS=Oryza sativa subsp. japonica GN=LOC_Os03g08999<br>PE=2 SV=1                                            | 2.04 |
| Q6ZK52    | Os08g0127100 protein OS=Oryza sativa subsp. japonica GN=Os08g0127100<br>PE=2 SV=1                                              | 2.03 |
| Q2QNV2    | Fiber protein Fb19, putative, expressed OS=Oryza sativa subsp. japonica<br>GN=LOC_Os12g36640 PE=2 SV=1                         | 2.02 |
| Q0E3L4    | Os02g0168100 protein (Fragment) OS=Oryza sativa subsp. japonica<br>GN=Os02g0168100 PE=4 SV=1                                   | 2.02 |
| Q94CU3    | Uricase OS=Oryza sativa subsp. japonica GN=P0423B08.43-1 PE=2 SV=1                                                             | 2.01 |
| Q7FAX1    | Peroxygenase OS=Oryza sativa subsp. japonica GN=PXG PE=2 SV=1                                                                  | 2.01 |
| Q75LD9    | Os03g0843300 protein OS=Oryza sativa subsp. japonica GN=OSJNBa0032G11.5<br>PE=2 SV=1                                           | 2.01 |
| Q7XNV4    | OSJNBb0015G09.12 protein OS=Oryza sativa subsp. japonica<br>GN=Os04g0227500 PE=2 SV=2                                          | 1.98 |
| Q8H620    | Os06g0176700 protein OS=Oryza sativa subsp. japonica GN=Os06g0176700<br>PE=3 SV=1                                              | 1.98 |
| Q8S1M1    | Embryonic abundant protein-like OS=Oryza sativa subsp. japonica<br>GN=Os01g0716500 PE=2 SV=1                                   | 1.98 |
| Q0J8R9    | Os04g0690800 protein OS=Oryza sativa subsp. japonica GN=Os04g0690800<br>PE=4 SV=1                                              | 1.98 |
| Q337M4    | Os10g0463800 protein OS=Oryza sativa subsp. japonica GN=Os10g0463800<br>PE=2 SV=1                                              | 1.98 |
| Q2QVJ8    | NADP-dependent oxidoreductase P2, putative, expressed OS=Oryza sativa<br>subsp. japonica GN=Os12g0226700 PE=4 SV=1             | 1.97 |
| A0A0P0V4A | Os01g0571166 protein OS=Oryza sativa subsp. japonica GN=Os01g0571166<br>PE=4 SV=1                                              | 1.95 |
| Q0DAI4    | Os06g0651000 protein OS=Oryza sativa subsp. japonica GN=Os06g0651000<br>PE=4 SV=1                                              | 1.95 |
| Q2QXL3    | ACT domain-containing protein, putative, expressed OS=Oryza sativa subsp.<br>japonica GN=Os12g0152700 PE=2 SV=1                | 1.94 |
| Q6Z2G8    | Os02g0705400 protein OS=Oryza sativa subsp. japonica GN=P0680A05.8-1<br>PE=2 SV=1                                              | 1.93 |
| Q53K63    | Prefoldin subunit 4 OS=Oryza sativa subsp. japonica GN=LOC_Os03g43020 PE=3<br>SV=1                                             | 1.93 |
| Q75IR2    | Os05g0163700 protein OS=Oryza sativa subsp. japonica GN=Os05g0163700<br>PE=2 SV=1                                              | 1.93 |
| Q6F2Y7    | Chaperone protein ClpB1 OS=Oryza sativa subsp. japonica GN=CLPB1 PE=2<br>SV=1                                                  | 1.93 |
| Q7X8W6    | OSJNBa0081C01.20 protein OS=Oryza sativa subsp. japonica<br>GN=Os04g0531900 PE=2 SV=2                                          | 1.93 |
| Q7XKI7    | Mitochondrial intermembrane space import and assembly protein 40 homolog<br>OS=Oryza sativa subsp. japonica GN=MIA40 PE=2 SV=2 | 1.92 |
| Q6J657    | Cell death associated protein OS=Oryza sativa subsp. japonica<br>GN=Os05g0410200 PE=2 SV=1                                     | 1.92 |
| Q5JJV6    | Os01g0965900 protein OS=Oryza sativa subsp. japonica GN=Os01g0965900<br>PE=2 SV=1                                              | 1.92 |

|        |                                                                                                     |      |
|--------|-----------------------------------------------------------------------------------------------------|------|
| O49827 | Chitinase OS=Oryza sativa subsp. japonica GN=Os01g0860500 PE=2 SV=1                                 | 1.91 |
| Q7XKV4 | Beta-glucosidase 12 OS=Oryza sativa subsp. japonica GN=BGLU12 PE=1 SV=2                             | 1.90 |
| Q8W2X5 | Flavanone 3-dioxygenase 2 OS=Oryza sativa subsp. japonica GN=F3H-2 PE=1 SV=1                        | 1.90 |
| Q6L509 | Os05g0460000 protein OS=Oryza sativa subsp. japonica GN=Os05g0460000 PE=2 SV=1                      | 1.90 |
| Q7Y0E8 | Probable nucleoredoxin 1-1 OS=Oryza sativa subsp. japonica GN=Os03g0405500 PE=2 SV=1                | 1.89 |
| Q2R429 | Expressed protein OS=Oryza sativa subsp. japonica GN=Os11g0491400 PE=2 SV=1                         | 1.89 |
| Q6ZJ08 | Monodehydroascorbate reductase 4, cytosolic OS=Oryza sativa subsp. japonica GN=MDAR4 PE=1 SV=1      | 1.89 |
| Q8RU06 | Cellulase containing protein, expressed OS=Oryza sativa subsp. japonica GN=OJ1208D02.5 PE=2 SV=1    | 1.89 |
| Q9SXF8 | Aquaporin PIP 1-3 OS=Oryza sativa subsp. japonica GN=PIP1-3 PE=2 SV=2                               | 1.87 |
| Q0DV66 | Os03g0146400 protein OS=Oryza sativa subsp. japonica GN=Os03g0146400 PE=4 SV=1                      | 1.85 |
| Q658G9 | Cytochrome P450 OS=Oryza sativa subsp. japonica GN=Os06g0129900 PE=2 SV=1                           | 1.85 |
| Q6ZCF3 | Os08g0205400 protein OS=Oryza sativa subsp. japonica GN=Os08g0205400 PE=2 SV=1                      | 1.85 |
| Q7XN11 | Gamma-aminobutyrate transaminase 1, mitochondrial OS=Oryza sativa subsp. japonica GN=OSL2 PE=1 SV=2 | 1.85 |
| Q7EZD7 | Sugar transport protein MST3 OS=Oryza sativa subsp. japonica GN=MST3 PE=2 SV=1                      | 1.85 |
| Q10PW9 | Sugar transport protein MST4 OS=Oryza sativa subsp. japonica GN=MST4 PE=1 SV=1                      | 1.84 |
| Q9ZQT3 | NB-ARC domain containing protein, expressed OS=Oryza sativa subsp. japonica GN=RPR1 PE=2 SV=1       | 1.83 |
| Q6K7A3 | Os02g0469600 protein OS=Oryza sativa subsp. japonica GN=Os02g0469600 PE=2 SV=1                      | 1.83 |
| Q69LD9 | Os07g0169600 protein OS=Oryza sativa subsp. japonica GN=Os07g0169600 PE=2 SV=1                      | 1.83 |
| Q6YVU4 | Os07g0539300 protein OS=Oryza sativa subsp. japonica GN=P0696F12.36-1 PE=2 SV=1                     | 1.83 |
| Q2QNT0 | Os12g0555200 protein OS=Oryza sativa subsp. japonica GN=LOC_Os12g36850 PE=2 SV=1                    | 1.83 |
| Q2R5M2 | Carboxypeptidase OS=Oryza sativa subsp. japonica GN=LOC_Os11g24510 PE=3 SV=1                        | 1.82 |
| Q42972 | Malate dehydrogenase, glyoxysomal OS=Oryza sativa subsp. japonica GN=Os12g0632700 PE=1 SV=3         | 1.82 |
| Q7XQ93 | OSJNBa0018M05.15 protein OS=Oryza sativa subsp. japonica GN=Os04g0674700 PE=2 SV=2                  | 1.82 |
| Q5ZBR8 | Os01g0795000 protein OS=Oryza sativa subsp. japonica GN=Os01g0795000 PE=4 SV=1                      | 1.82 |
| Q10PW8 | DnaK protein, expressed OS=Oryza sativa subsp. japonica GN=Os03g0218500 PE=2 SV=1                   | 1.81 |

|           |                                                                                                                                 |      |
|-----------|---------------------------------------------------------------------------------------------------------------------------------|------|
| Q6H7M1    | Fumarylacetoacetase OS=Oryza sativa subsp. japonica GN=FAH PE=2 SV=1                                                            | 1.81 |
| A0A0P0VVF | Os03g0248200 protein (Fragment) OS=Oryza sativa subsp. japonica<br>GN=Os03g0248200 PE=3 SV=1                                    | 1.80 |
| P42211    | Aspartic proteinase OS=Oryza sativa subsp. japonica GN=RAP PE=2 SV=2                                                            | 1.80 |
| Q8LHS0    | Neurofilament triplet M protein-like protein OS=Oryza sativa subsp. japonica<br>GN=P0039H02.109 PE=2 SV=1                       | 1.80 |
| Q0DGW8    | Os05g0507300 protein (Fragment) OS=Oryza sativa subsp. japonica<br>GN=Os05g0507300 PE=3 SV=1                                    | 1.80 |
| Q0D9C4    | Catalase isozyme B OS=Oryza sativa subsp. japonica GN=CATB PE=2 SV=1                                                            | 1.80 |
| Q10LF1    | Acyl carrier protein OS=Oryza sativa subsp. japonica GN=Os03g0352800 PE=2<br>SV=1                                               | 1.80 |
| Q7XW32    | OSJNBb0062H02.10 protein OS=Oryza sativa subsp. japonica<br>GN=Os04g0322100 PE=2 SV=2                                           | 1.80 |
| Q5QMT0    | Beta-glucosidase 1 OS=Oryza sativa subsp. japonica GN=BGLU1 PE=2 SV=1                                                           | 1.80 |
| Q94DD0    | Os01g0859200 protein OS=Oryza sativa subsp. japonica GN=Os01g0859200<br>PE=2 SV=1                                               | 1.79 |
| Q6ESZ6    | Cytochrome b-c1 complex subunit 6 OS=Oryza sativa subsp. japonica<br>GN=Os02g0541700 PE=3 SV=1                                  | 1.79 |
| Q84P96    | 3-ketoacyl-CoA thiolase-like protein OS=Oryza sativa subsp. japonica<br>GN=Os02g0817700 PE=2 SV=1                               | 1.79 |
| Q6K8R2    | Chitinase 6 OS=Oryza sativa subsp. japonica GN=Cht6 PE=2 SV=1                                                                   | 1.79 |
| Q9LGL5    | Os01g0160100 protein OS=Oryza sativa subsp. japonica GN=Os01g0160100<br>PE=3 SV=1                                               | 1.79 |
| Q9FEG7    | Os08g0434100 protein OS=Oryza sativa subsp. japonica GN=Os08g0434100<br>PE=2 SV=1                                               | 1.79 |
| Q2QN11    | Eukaryotic aspartyl protease family protein, expressed OS=Oryza sativa subsp.<br>japonica GN=Os12g0583300 PE=3 SV=1             | 1.78 |
| Q2RAZ2    | Alpha-L-arabinofuranosidase C-terminus family protein, expressed OS=Oryza<br>sativa subsp. japonica GN=LOC_Os11g03780 PE=4 SV=1 | 1.78 |
| Q10Q92    | CUE domain containing protein, expressed OS=Oryza sativa subsp. japonica<br>GN=Os03g0205000 PE=2 SV=1                           | 1.77 |
| C7J745    | Os09g0491852 protein OS=Oryza sativa subsp. japonica GN=Os09g0491852<br>PE=4 SV=1                                               | 1.77 |
| A0A0P0XNI | Os09g0442300 protein (Fragment) OS=Oryza sativa subsp. japonica<br>GN=Os09g0442300 PE=3 SV=1                                    | 1.76 |
| Q75PK7    | Os01g0315800 protein OS=Oryza sativa subsp. japonica GN=UXS-2 PE=2 SV=1                                                         | 1.76 |
| Q6YVX5    | Chloride channel protein OS=Oryza sativa subsp. japonica GN=Os02g0558100<br>PE=3 SV=1                                           | 1.75 |
| Q5ZAV7    | Os01g0783500 protein OS=Oryza sativa subsp. japonica GN=Os01g0783500<br>PE=2 SV=1                                               | 1.75 |
| Q5U1S8    | Peroxidase OS=Oryza sativa subsp. japonica GN=prx15 PE=2 SV=1                                                                   | 1.74 |
| A0A0N7KP2 | Os07g0683600 protein OS=Oryza sativa subsp. japonica GN=Os07g0683600<br>PE=4 SV=1                                               | 1.74 |
| Q75M67    | Expressed protein OS=Oryza sativa subsp. japonica GN=Os03g0381300 PE=4<br>SV=1                                                  | 1.74 |

|           |                                                                                                                                 |      |
|-----------|---------------------------------------------------------------------------------------------------------------------------------|------|
| Q5Z9N8    | 90 kDa heat shock protein OS= <i>Oryza sativa</i> subsp. <i>japonica</i> GN=Os06g0716700<br>PE=2 SV=1                           | 1.74 |
| Q84VG2    | Os09g0425900 protein OS= <i>Oryza sativa</i> subsp. <i>japonica</i> GN=Os09g0425900<br>PE=2 SV=1                                | 1.73 |
| Q6H5Y1    | Os02g0228300 protein OS= <i>Oryza sativa</i> subsp. <i>japonica</i> GN=Os02g0228300<br>PE=4 SV=1                                | 1.72 |
| A0A0P0V7Z | Os01g0740650 protein OS= <i>Oryza sativa</i> subsp. <i>japonica</i> GN=Os01g0740650<br>PE=4 SV=1                                | 1.72 |
| Q10G56    | Ornithine aminotransferase, mitochondrial OS= <i>Oryza sativa</i> subsp. <i>japonica</i><br>GN=OAT PE=2 SV=1                    | 1.72 |
| Q8LQD2    | Os01g0516600 protein OS= <i>Oryza sativa</i> subsp. <i>japonica</i> GN=B1108H10.11-1<br>PE=4 SV=1                               | 1.72 |
| Q7X7N2    | Arginase 1, mitochondrial OS= <i>Oryza sativa</i> subsp. <i>japonica</i> GN=ARG1 PE=2<br>SV=1                                   | 1.72 |
| Q69IN9    | Os09g0512900 protein OS= <i>Oryza sativa</i> subsp. <i>japonica</i> GN=P0450E05.3-1<br>PE=2 SV=1                                | 1.71 |
| Q10RH3    | Os03g0159100 protein OS= <i>Oryza sativa</i> subsp. <i>japonica</i> GN=Os03g0159100<br>PE=2 SV=1                                | 1.71 |
| Q6Z312    | bZIP transcription factor 23 OS= <i>Oryza sativa</i> subsp. <i>japonica</i> GN=BZIP23 PE=2<br>SV=1                              | 1.71 |
| A0A0P0XCD | Os08g0174300 protein OS= <i>Oryza sativa</i> subsp. <i>japonica</i> GN=Os08g0174300<br>PE=4 SV=1                                | 1.71 |
| Q0JB49    | Glutathione peroxidase OS= <i>Oryza sativa</i> subsp. <i>japonica</i> GN=Os04g0556300<br>PE=2 SV=1                              | 1.70 |
| B9FCW0    | Os04g0652700 protein OS= <i>Oryza sativa</i> subsp. <i>japonica</i> GN=Os04g0652700<br>PE=4 SV=1                                | 1.70 |
| Q53NE7    | Eukaryotic aspartyl protease family protein, expressed OS= <i>Oryza sativa</i> subsp. <i>japonica</i> GN=Os11g0183900 PE=3 SV=1 | 1.70 |
| Q2QNS7    | Os12g0555500 protein OS= <i>Oryza sativa</i> subsp. <i>japonica</i> GN=Os12g0555500<br>PE=2 SV=1                                | 1.70 |
| Q5VRM0    | Acyl-CoA-binding domain-containing protein 2 OS= <i>Oryza sativa</i> subsp. <i>japonica</i><br>GN=ACBP2 PE=1 SV=1               | 1.70 |
| Q2QZT1    | Os11g0673100 protein OS= <i>Oryza sativa</i> subsp. <i>japonica</i> GN=Os11g0673100<br>PE=2 SV=1                                | 1.70 |
| Q6K439    | Probable plastid-lipid-associated protein 2, chloroplastic OS= <i>Oryza sativa</i> subsp. <i>japonica</i> GN=PAP2 PE=2 SV=1     | 1.70 |
| Q5W6C5    | Carboxypeptidase OS= <i>Oryza sativa</i> subsp. <i>japonica</i> GN=Os05g0268500 PE=3<br>SV=1                                    | 1.70 |
| Q60DX1    | Thiamine pyrophosphokinase 3 OS= <i>Oryza sativa</i> subsp. <i>japonica</i> GN=TPK3 PE=2<br>SV=1                                | 1.69 |
| Q84PD0    | DNAJ-like protein OS= <i>Oryza sativa</i> subsp. <i>japonica</i> GN=LOC_Os03g44620 PE=2<br>SV=1                                 | 1.69 |
| Q5ZDH9    | Os01g0139200 protein OS= <i>Oryza sativa</i> subsp. <i>japonica</i> GN=Os01g0139200<br>PE=4 SV=1                                | 1.69 |
| Q8H7P3    | Expressed protein OS= <i>Oryza sativa</i> subsp. <i>japonica</i> GN=OJ1217B09.3 PE=2 SV=1                                       | 1.68 |
| Q6Z6A7    | Annexin OS= <i>Oryza sativa</i> subsp. <i>japonica</i> GN=Os02g0753800 PE=3 SV=1                                                | 1.68 |
| Q5KQJ3    | Os05g0181901 protein OS= <i>Oryza sativa</i> subsp. <i>japonica</i> GN=Os05g0182000<br>PE=4 SV=1                                | 1.68 |

|          |                                                                                                                              |      |
|----------|------------------------------------------------------------------------------------------------------------------------------|------|
| Q94DM2   | Peroxidase OS= <i>Oryza sativa</i> subsp. <i>japonica</i> GN=prx22 PE=2 SV=1                                                 | 1.67 |
| Q69QQ2   | Os09g0482200 protein OS= <i>Oryza sativa</i> subsp. <i>japonica</i> GN=Os09g0482500<br>PE=3 SV=1                             | 1.67 |
| Q6ZBH5   | 3-hydroxy-3-methylglutaryl coenzyme A synthase OS= <i>Oryza sativa</i> subsp. <i>japonica</i> GN=Os08g0544900 PE=2 SV=1      | 1.67 |
| Q5Z9H8   | Peptidyl-prolyl cis-trans isomerase OS= <i>Oryza sativa</i> subsp. <i>japonica</i> GN=P0655A07.5-2 PE=2 SV=1                 | 1.66 |
| P48642   | Glutathione reductase, cytosolic OS= <i>Oryza sativa</i> subsp. <i>japonica</i> GN=GRC2<br>PE=2 SV=2                         | 1.66 |
| Q688X8   | 'putative heat shock protein, hsp40 OS= <i>Oryza sativa</i> subsp. <i>japonica</i> GN=Os05g0562300 PE=2 SV=1                 | 1.66 |
| Q75IM9   | Isovaleryl-CoA dehydrogenase, mitochondrial OS= <i>Oryza sativa</i> subsp. <i>japonica</i> GN=Os05g0125500 PE=2 SV=2         | 1.66 |
| Q75LJ3   | Electron transfer flavoprotein subunit alpha, mitochondrial OS= <i>Oryza sativa</i> subsp. <i>japonica</i> GN=ETFA PE=2 SV=1 | 1.66 |
| Q75HX0   | Actin OS= <i>Oryza sativa</i> subsp. <i>japonica</i> GN=Os05g0438800 PE=2 SV=1                                               | 1.65 |
| Q5ZEL4   | Os01g0159400 protein OS= <i>Oryza sativa</i> subsp. <i>japonica</i> GN=Os01g0159400<br>PE=2 SV=1                             | 1.65 |
| Q0DQM3   | Os03g0580200 protein (Fragment) OS= <i>Oryza sativa</i> subsp. <i>japonica</i> GN=Os03g0580200 PE=4 SV=1                     | 1.65 |
| Q6ITC5   | Cell death-related protein OS= <i>Oryza sativa</i> subsp. <i>japonica</i> GN=A2 PE=2 SV=1                                    | 1.64 |
| Q10PW2   | Tubulin alpha chain OS= <i>Oryza sativa</i> subsp. <i>japonica</i> GN=TubA PE=2 SV=1                                         | 1.64 |
| Q67WV5   | Os06g0643000 protein OS= <i>Oryza sativa</i> subsp. <i>japonica</i> GN=Os06g0643000<br>PE=4 SV=1                             | 1.64 |
| Q67VZ1   | Annexin OS= <i>Oryza sativa</i> subsp. <i>japonica</i> GN=Os06g0221200 PE=2 SV=1                                             | 1.64 |
| Q10C96   | Os03g0790500 protein OS= <i>Oryza sativa</i> subsp. <i>japonica</i> GN=LOC_Os03g57640<br>PE=2 SV=1                           | 1.64 |
| Q6Z481   | Glycosyltransferase OS= <i>Oryza sativa</i> subsp. <i>japonica</i> GN=Os07g0503300 PE=2<br>SV=1                              | 1.64 |
| Q53LQ0   | Protein disulfide isomerase-like 1-1 OS= <i>Oryza sativa</i> subsp. <i>japonica</i> GN=PDIL1-1<br>PE=2 SV=1                  | 1.64 |
| Q6Z8N9   | Os08g0512400 protein OS= <i>Oryza sativa</i> subsp. <i>japonica</i> GN=P0711H09.10-2<br>PE=4 SV=1                            | 1.63 |
| Q6ZFI9   | 60 kDa chaperonin beta subunit OS= <i>Oryza sativa</i> subsp. <i>japonica</i> GN=Os02g0102900 PE=2 SV=1                      | 1.63 |
| Q7XSC5   | OSJNBa0027O01.6 protein OS= <i>Oryza sativa</i> subsp. <i>japonica</i> GN=Os04g0181100<br>PE=2 SV=2                          | 1.63 |
| A0A0P0WM | Os05g0432700 protein (Fragment) OS= <i>Oryza sativa</i> subsp. <i>japonica</i> GN=Os05g0432700 PE=4 SV=1                     | 1.63 |
| Q10T26   | Os03g0103200 protein OS= <i>Oryza sativa</i> subsp. <i>japonica</i> GN=LOC_Os03g01310<br>PE=2 SV=1                           | 1.63 |
| Q8GVH2   | Os07g0638100 protein OS= <i>Oryza sativa</i> subsp. <i>japonica</i> GN=OJ1340_C08.105<br>PE=4 SV=1                           | 1.63 |
| Q8H6G8   | Probable inorganic phosphate transporter 1-8 OS= <i>Oryza sativa</i> subsp. <i>japonica</i> GN=PHT1-8 PE=2 SV=1              | 1.63 |
| P49100   | Cytochrome b5 OS= <i>Oryza sativa</i> subsp. <i>japonica</i> GN=Os05g0108800 PE=2 SV=2                                       | 1.63 |



|            |                                                                                                              |      |
|------------|--------------------------------------------------------------------------------------------------------------|------|
| Q7XUX4     | OSJNBa0027P08.20 protein OS=Oryza sativa subsp. japonica<br>GN=Os04g0446300 PE=2 SV=2                        | 1.63 |
| Q10MK9     | AMP-binding enzyme family protein, expressed OS=Oryza sativa subsp. japonica GN=Os03g0305100 PE=4 SV=1       | 1.63 |
| Q69XR7     | Acyl-coenzyme A oxidase OS=Oryza sativa subsp. japonica GN=Os06g0354500<br>PE=2 SV=1                         | 1.62 |
| Q6K6I2     | Os02g0473200 protein OS=Oryza sativa subsp. japonica GN=P0487H05.16-1<br>PE=3 SV=1                           | 1.62 |
| Q7XCK6     | Chitinase 8 OS=Oryza sativa subsp. japonica GN=Cht8 PE=2 SV=1                                                | 1.62 |
| Q0J4P2     | Heat shock protein 81-1 OS=Oryza sativa subsp. japonica GN=HSP81-1 PE=3<br>SV=2                              | 1.62 |
| Q0JJQ7     | Malic enzyme (Fragment) OS=Oryza sativa subsp. japonica GN=Os01g0723400<br>PE=3 SV=1                         | 1.62 |
| A0A0P0YAL1 | Phenylalanine ammonia-lyase OS=Oryza sativa subsp. japonica<br>GN=Os12g0520200 PE=3 SV=1                     | 1.62 |
| Q0DI31     | Cytochrome c OS=Oryza sativa subsp. japonica GN=CC-1 PE=1 SV=1                                               | 1.62 |
| Q9AT30     | Chitinase 2, putative, expressed OS=Oryza sativa subsp. japonica GN=Rcb4 PE=2<br>SV=1                        | 1.61 |
| A3AQC6     | Os04g0117800 protein OS=Oryza sativa subsp. japonica GN=Os04g0117900<br>PE=2 SV=1                            | 1.61 |
| A0A0P0UY0  | Os01g0141100 protein OS=Oryza sativa subsp. japonica GN=Os01g0141100<br>PE=4 SV=1                            | 1.61 |
| Q5NA06     | Coatomer subunit zeta-3 OS=Oryza sativa subsp. japonica GN=Os01g0838800<br>PE=2 SV=1                         | 1.60 |
| Q5Z414     | Os06g0730800 protein OS=Oryza sativa subsp. japonica GN=Os06g0730800<br>PE=2 SV=1                            | 1.60 |
| Q5JMS4     | Peroxidase OS=Oryza sativa subsp. japonica GN=Os01g0962700 PE=2 SV=1                                         | 1.60 |
| Q6Z0R0     | Os08g0455800 protein OS=Oryza sativa subsp. japonica GN=Os08g0455800<br>PE=2 SV=1                            | 1.60 |
| Q941F5     | Os11g0592200 protein OS=Oryza sativa subsp. japonica GN=PR4 PE=2 SV=1                                        | 1.60 |
| P09229     | Cysteine proteinase inhibitor 1 OS=Oryza sativa subsp. japonica<br>GN=Os01g0803200 PE=1 SV=2                 | 1.60 |
| Q7X6T8     | Os07g0217600 protein OS=Oryza sativa subsp. japonica GN=OJ1080_F08.127<br>PE=2 SV=1                          | 1.60 |
| Q10PD0     | Purple acid phosphatase OS=Oryza sativa subsp. japonica GN=LOC_Os03g13540<br>PE=2 SV=1                       | 1.60 |
| Q6Z244     | Os08g0480200 protein OS=Oryza sativa subsp. japonica GN=Os08g0480200<br>PE=2 SV=1                            | 1.60 |
| Q06398     | Probable glutathione S-transferase GSTU6 OS=Oryza sativa subsp. japonica<br>GN=GSTU6 PE=2 SV=2               | 1.60 |
| Q8H3A4     | ABC transporter permease protein-like protein OS=Oryza sativa subsp. japonica<br>GN=P0616D06.112-1 PE=2 SV=1 | 1.60 |
| Q6I683     | Os05g0363200 protein OS=Oryza sativa subsp. japonica GN=UXS-5 PE=2 SV=1                                      | 1.60 |
| Q6ZHS1     | Glycosyltransferase OS=Oryza sativa subsp. japonica GN=Os02g0188000 PE=3<br>SV=1                             | 1.59 |
| Q84SZ7     | AAA1 OS=Oryza sativa subsp. japonica GN=AAA1 PE=2 SV=1                                                       | 1.59 |

|           |                                                                                                                  |      |
|-----------|------------------------------------------------------------------------------------------------------------------|------|
| Q8S7M7    | Plant intracellular Ras-group-related LRR protein 5 OS= <i>Oryza sativa</i> subsp. japonica GN=IRL5 PE=2 SV=1    | 1.59 |
| Q5SN58    | Os01g0664500 protein OS= <i>Oryza sativa</i> subsp. japonica GN=P0003E08.12-1 PE=2 SV=1                          | 1.58 |
| Q6H795    | Chaperone protein ClpD1, chloroplastic OS= <i>Oryza sativa</i> subsp. japonica GN=CLPD1 PE=2 SV=1                | 1.58 |
| Q6ESJ0    | Glutathione peroxidase OS= <i>Oryza sativa</i> subsp. japonica GN=Os02g0664000 PE=2 SV=1                         | 1.58 |
| Q0J8A4    | Glyceraldehyde-3-phosphate dehydrogenase 1, cytosolic OS= <i>Oryza sativa</i> subsp. japonica GN=GAPC1 PE=1 SV=1 | 1.58 |
| Q6YX79    | GHMP kinase-like protein OS= <i>Oryza sativa</i> subsp. japonica GN=Os02g0141300 PE=2 SV=1                       | 1.58 |
| Q7XQU7    | Probable protein phosphatase 2C 41 OS= <i>Oryza sativa</i> subsp. japonica GN=Os04g0452000 PE=2 SV=2             | 1.58 |
| Q7XLZ6    | OSJNBa0086O06.13 protein OS= <i>Oryza sativa</i> subsp. japonica GN=Os04g0589900 PE=2 SV=2                       | 1.58 |
| Q8H8C7    | Chitin elicitor-binding protein OS= <i>Oryza sativa</i> subsp. japonica GN=CEBIP PE=1 SV=1                       | 1.57 |
| Q5Z7I5    | Os06g0548200 protein OS= <i>Oryza sativa</i> subsp. japonica GN=Os06g0548200 PE=3 SV=1                           | 1.57 |
| Q5QLQ5    | Os01g0667200 protein OS= <i>Oryza sativa</i> subsp. japonica GN=Os01g0667200 PE=2 SV=1                           | 1.57 |
| Q6Z7B0    | Heat shock 70 kDa protein BIP1 OS= <i>Oryza sativa</i> subsp. japonica GN=BIP1 PE=1 SV=1                         | 1.57 |
| Q6I605    | Os05g0557200 protein OS= <i>Oryza sativa</i> subsp. japonica GN=Os05g0557200 PE=2 SV=1                           | 1.57 |
| Q5JKZ9    | Os01g0952600 protein OS= <i>Oryza sativa</i> subsp. japonica GN=Os01g0952600 PE=3 SV=1                           | 1.57 |
| Q5NA77    | C2 domain-containing protein-like OS= <i>Oryza sativa</i> subsp. japonica GN=Os01g0242600 PE=2 SV=1              | 1.57 |
| Q9LDX7    | Os01g0235300 protein OS= <i>Oryza sativa</i> subsp. japonica GN=Os01g0235300 PE=2 SV=1                           | 1.57 |
| Q650Z3    | Os09g0572900 protein OS= <i>Oryza sativa</i> subsp. japonica GN=Os09g0572900 PE=3 SV=1                           | 1.57 |
| Q942L2    | Protein disulfide isomerase-like 2-2 OS= <i>Oryza sativa</i> subsp. japonica GN=PDIL2-2 PE=2 SV=1                | 1.57 |
| C7J6W5    | Os09g0482660 protein (Fragment) OS= <i>Oryza sativa</i> subsp. japonica GN=Os09g0482660 PE=4 SV=1                | 1.57 |
| Q53NG8    | Aldehyde dehydrogenase OS= <i>Oryza sativa</i> subsp. japonica GN=Os11g0186200 PE=2 SV=1                         | 1.56 |
| A0A0P0W7I | Glycosyltransferase OS= <i>Oryza sativa</i> subsp. japonica GN=Os04g0206700 PE=3 SV=1                            | 1.56 |
| A0A0P0VG7 | Os02g0207900 protein OS= <i>Oryza sativa</i> subsp. japonica GN=Os02g0207900 PE=4 SV=1                           | 1.56 |
| Q94DL7    | Os01g0963600 protein OS= <i>Oryza sativa</i> subsp. japonica GN=Os01g0963600 PE=2 SV=1                           | 1.56 |
| Q6L4Z4    | Os05g0462400 protein OS= <i>Oryza sativa</i> subsp. japonica GN=Os05g0462400 PE=4 SV=1                           | 1.56 |
| Q6ZKI2    | Os08g0139000 protein OS= <i>Oryza sativa</i> subsp. japonica GN=OJ1119_D01.17-1 PE=2 SV=1                        | 1.56 |



|           |                                                                                                                   |      |
|-----------|-------------------------------------------------------------------------------------------------------------------|------|
| Q0J2B5    | Aminopeptidase M1-C OS=Oryza sativa subsp. japonica GN=Os09g0362500<br>PE=2 SV=2                                  | 1.56 |
| Q52RG7    | Sphingosine-1-phosphate lyase OS=Oryza sativa subsp. japonica GN=SPL PE=2<br>SV=3                                 | 1.55 |
| Q6K6X2    | Os02g0610400 protein OS=Oryza sativa subsp. japonica GN=Os02g0610400<br>PE=2 SV=1                                 | 1.55 |
| Q2R1S1    | Harpin binding protein 1, putative, expressed OS=Oryza sativa subsp. japonica<br>GN=LOC_Os11g38260 PE=2 SV=1      | 1.55 |
| Q7XUP7    | Peptide methionine sulfoxide reductase A2-1 OS=Oryza sativa subsp. japonica<br>GN=MSRA2-1 PE=2 SV=2               | 1.55 |
| C7J895    | Os11g0226933 protein (Fragment) OS=Oryza sativa subsp. japonica<br>GN=Os11g0226933 PE=4 SV=1                      | 1.55 |
| Q5KQK6    | Os05g0179800 protein OS=Oryza sativa subsp. japonica GN=Os05g0179800<br>PE=4 SV=1                                 | 1.55 |
| Q5VRZ6    | Os06g0112400 protein OS=Oryza sativa subsp. japonica GN=Os06g0112400<br>PE=2 SV=1                                 | 1.55 |
| Q0ILB9    | Glycerol kinase-like protein OS=Oryza sativa subsp. japonica GN=OGK1 PE=2<br>SV=1                                 | 1.55 |
| Q2QNQ6    | Expressed protein OS=Oryza sativa subsp. japonica GN=Os12g0557400 PE=2<br>SV=1                                    | 1.55 |
| Q8S718    | Glutathione S-transferase GSTU6, putative, expressed OS=Oryza sativa subsp.<br>japonica GN=Os10g0530400 PE=2 SV=1 | 1.55 |
| Q8RU26    | Os01g0687400 protein OS=Oryza sativa subsp. japonica GN=Os01g0687400<br>PE=2 SV=1                                 | 1.54 |
| A0A0P0W32 | Os03g0750100 protein OS=Oryza sativa subsp. japonica GN=Os03g0750100<br>PE=4 SV=1                                 | 1.54 |
| Q0JIL1    | Probable nucleoredoxin 2 OS=Oryza sativa subsp. japonica GN=Os01g0794400<br>PE=2 SV=1                             | 1.54 |
| Q8H4K6    | Reticulon-like protein OS=Oryza sativa subsp. japonica GN=OJ1351_C05.119<br>PE=2 SV=1                             | 1.54 |
| Q75L18    | Os05g0112800 protein OS=Oryza sativa subsp. japonica GN=Os05g0112800<br>PE=2 SV=1                                 | 1.54 |
| Q6YZX6    | Putative aconitate hydratase, cytoplasmic OS=Oryza sativa subsp. japonica<br>GN=Os08g0191100 PE=3 SV=1            | 1.54 |
| Q6YW09    | Os08g0250700 protein OS=Oryza sativa subsp. japonica GN=Os08g0250700<br>PE=2 SV=1                                 | 1.54 |
| Q9FDZ1    | Cytochrome P450 OS=Oryza sativa subsp. japonica GN=CYP72A18 PE=2 SV=1                                             | 1.54 |
| Q6K5Q1    | Peptidylprolyl isomerase OS=Oryza sativa subsp. japonica GN=Os02g0491400<br>PE=4 SV=1                             | 1.54 |
| Q9SXV0    | Cytochrome c oxidase subunit 6b OS=Oryza sativa subsp. japonica GN=COX6b-1<br>PE=2 SV=1                           | 1.53 |
| Q7XWU3    | Probable cinnamyl alcohol dehydrogenase 6 OS=Oryza sativa subsp. japonica<br>GN=CAD6 PE=2 SV=2                    | 1.53 |
| Q6H7R1    | Os02g0643000 protein OS=Oryza sativa subsp. japonica GN=Os02g0643000<br>PE=2 SV=1                                 | 1.53 |
| Q84P62    | OSJNBa0087O24.10 protein OS=Oryza sativa subsp. japonica<br>GN=Os04g0665800 PE=2 SV=1                             | 1.53 |
| Q10MN2    | Peroxisomal membrane protein 11-3 OS=Oryza sativa subsp. japonica<br>GN=PEX11-3 PE=2 SV=1                         | 1.53 |

|           |                                                                                                                    |      |
|-----------|--------------------------------------------------------------------------------------------------------------------|------|
| Q6AUV1    | Xanthine dehydrogenase OS= <i>Oryza sativa</i> subsp. <i>japonica</i> GN=XDH PE=2 SV=1                             | 1.53 |
| Q2QWZ9    | Transmembrane 9 superfamily member OS= <i>Oryza sativa</i> subsp. <i>japonica</i><br>GN=LOC_Os12g07670 PE=2 SV=1   | 1.52 |
| Q0DLG8    | Os05g0103100 protein OS= <i>Oryza sativa</i> subsp. <i>japonica</i> GN=Os05g0103100<br>PE=4 SV=1                   | 1.52 |
| Q75IC7    | Secretory carrier-associated membrane protein 4 OS= <i>Oryza sativa</i> subsp. <i>japonica</i> GN=SCAMP4 PE=2 SV=1 | 1.52 |
| Q6Z6L4    | Aminopeptidase M1-A OS= <i>Oryza sativa</i> subsp. <i>japonica</i> GN=Os02g0218200<br>PE=2 SV=1                    | 1.52 |
| Q657Y8    | Protein RER1 OS= <i>Oryza sativa</i> subsp. <i>japonica</i> GN=Os01g0106200 PE=2 SV=1                              | 1.52 |
| Q75M70    | Expressed protein OS= <i>Oryza sativa</i> subsp. <i>japonica</i> GN=Os03g0381500 PE=2<br>SV=1                      | 1.52 |
| Q10BU2    | Germin-like protein 3-7 OS= <i>Oryza sativa</i> subsp. <i>japonica</i> GN=GER7 PE=2 SV=1                           | 1.52 |
| Q0E4K1    | Catalase isozyme A OS= <i>Oryza sativa</i> subsp. <i>japonica</i> GN=CATA PE=2 SV=1                                | 1.52 |
| Q6ZBK6    | Os08g0519400 protein OS= <i>Oryza sativa</i> subsp. <i>japonica</i> GN=Os08g0519400<br>PE=4 SV=1                   | 1.51 |
| Q6AUF2    | Os05g0565400 protein OS= <i>Oryza sativa</i> subsp. <i>japonica</i> GN=Os05g0565400<br>PE=2 SV=1                   | 1.51 |
| Q8H3C9    | IAA-amino acid hydrolase ILR1-like 7 OS= <i>Oryza sativa</i> subsp. <i>japonica</i> GN=ILL7<br>PE=2 SV=1           | 1.51 |
| Q7XSU8    | Peroxidase OS= <i>Oryza sativa</i> subsp. <i>japonica</i> GN=Os04g0688300 PE=2 SV=2                                | 1.51 |
| Q7XD86    | Os10g0486900 protein OS= <i>Oryza sativa</i> subsp. <i>japonica</i> GN=Os10g0486900<br>PE=2 SV=2                   | 1.51 |
| A0A0P0VBP | Os01g0895600 protein OS= <i>Oryza sativa</i> subsp. <i>japonica</i> GN=Os01g0895600<br>PE=3 SV=1                   | 1.51 |
| Q0ILZ4    | DEAD-box ATP-dependent RNA helicase 9 OS= <i>Oryza sativa</i> subsp. <i>japonica</i><br>GN=Os12g0611200 PE=2 SV=1  | 1.51 |
| Q10SR3    | 70 kDa heat shock protein OS= <i>Oryza sativa</i> subsp. <i>japonica</i> GN=Os03g0113700<br>PE=2 SV=1              | 1.51 |
| Q94DM8    | Ubiquitin-fold modifier 1 OS= <i>Oryza sativa</i> subsp. <i>japonica</i> GN=Os01g0962400<br>PE=3 SV=1              | 1.50 |
| Q9XGP7    | Tricin synthase 1 OS= <i>Oryza sativa</i> subsp. <i>japonica</i> GN=ROMT-15 PE=1 SV=1                              | 1.50 |
| Q5W6F1    | Cinnamate-4-hydroxylase OS= <i>Oryza sativa</i> subsp. <i>japonica</i> GN=OsC4HL PE=2<br>SV=1                      | 1.50 |
| Q6Z8U4    | Os08g0492100 protein OS= <i>Oryza sativa</i> subsp. <i>japonica</i> GN=Os08g0492100<br>PE=2 SV=1                   | 1.50 |

| NIP_ S2 vs CO_ Proteins decreased in abundance |                                                                                                                         |      |       |
|------------------------------------------------|-------------------------------------------------------------------------------------------------------------------------|------|-------|
| Accession                                      | Description                                                                                                             | FC   |       |
| O64437                                         | Inositol-3-phosphate synthase 1 OS=Oryza sativa subsp. japonica GN=RINO1 PE=1 SV=2                                      | 0.39 | -2.53 |
| Q5NAM3                                         | Branched-chain amino acid aminotransferase-like OS=Oryza sativa subsp. japonica GN=Os01g0238500 PE=4 SV=1               | 0.41 | -2.44 |
|                                                | Os12g0189300 protein OS=Oryza sativa subsp. japonica GN=Os12g0189300 PE=4 SV=1                                          | 0.44 | -2.28 |
| Q0IPL3                                         | Os07g0580900 protein OS=Oryza sativa subsp. japonica GN=Os07g0580900 PE=1 SV=1                                          | 0.44 | -2.26 |
| Q7XI92                                         | Glycosyltransferase OS=Oryza sativa subsp. japonica GN=Os06g0289900 PE=2 SV=1                                           | 0.45 | -2.24 |
| Q5VME5                                         | Os02g0781400 protein OS=Oryza sativa subsp. japonica GN=OJ1369_G08.10-1 PE=2 SV=1                                       | 0.45 | -2.23 |
| Q6K826                                         | Probable GTP diphosphokinase CRSH2, chloroplastic OS=Oryza sativa subsp. japonica GN=CRSH2 PE=2 SV=1                    | 0.46 | -2.18 |
| Q6ATB2                                         | NAD dependent epimerase/dehydratase family protein, expressed OS=Oryza sativa subsp. japonica GN=OJ1754_E06.1 PE=4 SV=1 | 0.46 | -2.18 |
| Q84JG9                                         | Os02g0668100 protein OS=Oryza sativa subsp. japonica GN=Os02g0668100 PE=1 SV=1                                          | 0.46 | -2.18 |
| Q6ET88                                         | Os02g0817900 protein OS=Oryza sativa subsp. japonica GN=Os02g0817900 PE=3 SV=1                                          | 0.46 | -2.16 |
| Q0DWE8                                         | Expressed protein OS=Oryza sativa subsp. japonica GN=Os03g0439700 PE=4 SV=1                                             | 0.46 | -2.16 |
| Q10J01                                         | Os01g0106300 protein OS=Oryza sativa subsp. japonica GN=Os01g0106300 PE=2 SV=1                                          | 0.47 | -2.11 |
| Q9FTN6                                         | Magnesium-chelatase subunit ChlH, chloroplastic OS=Oryza sativa subsp. japonica GN=CHLH PE=1 SV=1                       | 0.48 | -2.09 |
| Q10M50                                         | Os02g0608600 protein (Fragment) OS=Oryza sativa subsp. japonica GN=Os02g0608600 PE=4 SV=1                               | 0.49 | -2.06 |
| Q0DZN5                                         | Protochlorophyllide reductase B, chloroplastic OS=Oryza sativa subsp. japonica GN=PORB PE=2 SV=1                        | 0.49 | -2.05 |
| Q8W3D9                                         | Os02g0285800 protein OS=Oryza sativa subsp. japonica GN=Os02g0285800 PE=4 SV=1                                          | 0.50 | -2.01 |
| Q6KA61                                         | Os02g0589000 protein OS=Oryza sativa subsp. japonica GN=Os02g0589000 PE=4 SV=1                                          | 0.50 | -1.99 |
| Q6YY42                                         | Os08g0130400 protein OS=Oryza sativa subsp. japonica GN=Os08g0130400 PE=2 SV=1                                          | 0.51 | -1.96 |
| B7EBJ6                                         | Expressed protein OS=Oryza sativa subsp. japonica GN=OSJNBa0031O09.02 PE=2 SV=1                                         | 0.51 | -1.95 |
| Q8LLP6                                         | Arabinogalactan protein-like OS=Oryza sativa subsp. japonica GN=Os01g0668100 PE=2 SV=1                                  | 0.51 | -1.94 |
| Q5QLS1                                         | Purple acid phosphatase OS=Oryza sativa subsp. japonica GN=Os08g0531000 PE=2 SV=1                                       | 0.52 | -1.93 |
| Q6ZI95                                         |                                                                                                                         |      |       |

|            |                                                                                                                |      |       |
|------------|----------------------------------------------------------------------------------------------------------------|------|-------|
| Q33AG7     | CMV 1a interacting protein 1, putative, expressed<br>OS=Oryza sativa subsp. japonica GN=Os10g0181600 PE=2 SV=2 | 0.52 | -1.92 |
| Q6H6D2     | Porphobilinogen deaminase, chloroplastic OS=Oryza sativa subsp. japonica GN=HEMC PE=2 SV=1                     | 0.52 | -1.92 |
| Q0DSS9     | Os03g0290300 protein (Fragment) OS=Oryza sativa subsp. japonica GN=Os03g0290300 PE=4 SV=1                      | 0.52 | -1.92 |
| Q10LR9     | Uroporphyrinogen decarboxylase 2, chloroplastic OS=Oryza sativa subsp. japonica GN=Os03g0337600 PE=3 SV=1      | 0.53 | -1.88 |
| A0A0N7KEB  | Os01g0919900 protein OS=Oryza sativa subsp. japonica GN=Os01g0919900 PE=4 SV=1                                 | 0.53 | -1.87 |
| Q6ZLK8     | Os07g0134000 protein OS=Oryza sativa subsp. japonica GN=OJ1118_D07.26-1 PE=2 SV=1                              | 0.54 | -1.85 |
| Q6Z1Y9     | Os08g0101700 protein OS=Oryza sativa subsp. japonica GN=Os08g0101700 PE=2 SV=1                                 | 0.54 | -1.85 |
| Q0D5I5     | Os07g0558300 protein OS=Oryza sativa subsp. japonica GN=Os07g0558300 PE=2 SV=1                                 | 0.54 | -1.84 |
| Q53RM0     | Magnesium-chelatase subunit Chll, chloroplastic OS=Oryza sativa subsp. japonica GN=CHLI PE=1 SV=1              | 0.55 | -1.83 |
| Q7XUY5     | OSJNBb0048E02.12 protein OS=Oryza sativa subsp. japonica GN=Os04g0465600 PE=2 SV=1                             | 0.55 | -1.83 |
| Q6ZGW6     | Delta-12 fatty acid desaturase OS=Oryza sativa subsp. japonica GN=FAD2 PE=2 SV=1                               | 0.56 | -1.79 |
| A0A0P0Y573 | Os11g0673200 protein OS=Oryza sativa subsp. japonica GN=Os11g0673200 PE=4 SV=1                                 | 0.56 | -1.79 |
| A0A0N7KSP1 | Os11g0237700 protein OS=Oryza sativa subsp. japonica GN=Os11g0237700 PE=4 SV=1                                 | 0.56 | -1.78 |
| Q5ZC82     | Cytokinin riboside 5'-monophosphate phosphoribohydrolase LOG OS=Oryza sativa subsp. japonica GN=LOG PE=1 SV=1  | 0.56 | -1.77 |
| A0A0P0Y8U6 | Os12g0263000 protein (Fragment) OS=Oryza sativa subsp. japonica GN=Os12g0263000 PE=4 SV=1                      | 0.57 | -1.77 |
| Q8LHN4     | Os07g0631900 protein OS=Oryza sativa subsp. japonica GN=P0519E12.113 PE=4 SV=1                                 | 0.57 | -1.77 |
| A0A0P0X2H1 | Os07g0158300 protein (Fragment) OS=Oryza sativa subsp. japonica GN=Os07g0158300 PE=4 SV=1                      | 0.57 | -1.76 |
| P0C587     | Glutamyl-tRNA reductase, chloroplastic OS=Oryza sativa subsp. japonica GN=Os10g0502400 PE=2 SV=1               | 0.57 | -1.76 |
| Q10SD2     | Expressed protein OS=Oryza sativa subsp. japonica GN=Os03g0126300 PE=2 SV=1                                    | 0.57 | -1.75 |
| Q7XN02     | OSJNBb0038F03.9 protein OS=Oryza sativa subsp. japonica GN=OSJNBb0038F03.9 PE=4 SV=1                           | 0.57 | -1.75 |
| Q7F1H3     | Blue copper-binding protein-like OS=Oryza sativa subsp. japonica GN=OJ1118_G09.114 PE=2 SV=1                   | 0.57 | -1.75 |
| Q0JJS8     | Fe-S cluster assembly factor HCF101, chloroplastic OS=Oryza sativa subsp. japonica GN=HCF101 PE=3 SV=3         | 0.58 | -1.74 |

|            |                                                                                                               |      |       |
|------------|---------------------------------------------------------------------------------------------------------------|------|-------|
| Q75IY5     | Expressed protein OS=Oryza sativa subsp. japonica<br>GN=LOC_Os03g30092 PE=2 SV=1                              | 0.58 | -1.74 |
| Q9AXB0     | Uroporphyrinogen decarboxylase 1, chloroplastic OS=Oryza<br>sativa subsp. japonica GN=Os01g0622300 PE=2 SV=1  | 0.58 | -1.73 |
| Q0E243     | Os02g0273100 protein OS=Oryza sativa subsp. japonica<br>GN=Os02g0273100 PE=2 SV=1                             | 0.58 | -1.72 |
| Q5Z8V9     | Delta-aminolevulinic acid dehydratase, chloroplastic<br>OS=Oryza sativa subsp. japonica GN=HEMB PE=2 SV=1     | 0.58 | -1.71 |
| Q10LH0     | Divinyl chlorophyllide a 8-vinyl-reductase, chloroplastic<br>OS=Oryza sativa subsp. japonica GN=DVR PE=3 SV=1 | 0.58 | -1.71 |
| Q75LC0     | Os03g0844900 protein OS=Oryza sativa subsp. japonica<br>GN=OSJNBa0032G11.21 PE=2 SV=1                         | 0.59 | -1.71 |
| A0A0P0XZ68 | Os11g0153600 protein OS=Oryza sativa subsp. japonica<br>GN=Os11g0153600 PE=4 SV=1                             | 0.59 | -1.69 |
| B7FA34     | Os05g0548900 protein OS=Oryza sativa subsp. japonica<br>GN=Os05g0548900 PE=2 SV=1                             | 0.59 | -1.69 |
| Q69S79     | Os02g0575500 protein OS=Oryza sativa subsp. japonica<br>GN=P0703B01.21-1 PE=4 SV=1                            | 0.60 | -1.67 |
| Q2QND9     | Expressed protein OS=Oryza sativa subsp. japonica<br>GN=Os12g0569200 PE=4 SV=1                                | 0.60 | -1.67 |
| Q84P94     | OSJNBa0043A12.15 protein OS=Oryza sativa subsp.<br>japonica GN=Os04g0668800 PE=2 SV=1                         | 0.60 | -1.67 |
| B7EIQ8     | Os02g0125700 protein OS=Oryza sativa subsp. japonica<br>GN=Os02g0125700 PE=2 SV=1                             | 0.60 | -1.67 |
| Q6K209     | Os02g0629800 protein OS=Oryza sativa subsp. japonica<br>GN=Os02g0629800 PE=3 SV=1                             | 0.60 | -1.66 |
| B7EYZ0     | Os05g0456300 protein OS=Oryza sativa subsp. japonica<br>GN=Os05g0456300 PE=2 SV=1                             | 0.60 | -1.66 |
| Q2QW43     | Expressed protein OS=Oryza sativa subsp. japonica<br>GN=Os12g0209000 PE=4 SV=1                                | 0.60 | -1.65 |
| Q2QYE1     | Probable apyrase 3 OS=Oryza sativa subsp. japonica<br>GN=APY3 PE=2 SV=2                                       | 0.61 | -1.65 |
| Q8LR33     | Os01g0662700 protein OS=Oryza sativa subsp. japonica<br>GN=Os01g0662700 PE=3 SV=1                             | 0.61 | -1.65 |
| Q84QV5     | Os08g0525700 protein OS=Oryza sativa subsp. japonica<br>GN=OJ1191_A10.120 PE=4 SV=1                           | 0.61 | -1.65 |
| Q84QW4     | Os08g0524400 protein OS=Oryza sativa subsp. japonica<br>GN=OJ1191_A10.104 PE=4 SV=1                           | 0.61 | -1.64 |
| Q9FTN5     | Os01g0106400 protein OS=Oryza sativa subsp. japonica<br>GN=Os01g0106400 PE=2 SV=1                             | 0.61 | -1.64 |
| Q84S01     | Os08g0152700 protein OS=Oryza sativa subsp. japonica<br>GN=OJ1349_D05.118 PE=2 SV=1                           | 0.61 | -1.64 |
| Q69MM2     | HMG type nucleosome/chromatin assembly factor<br>OS=Oryza sativa subsp. japonica GN=Os09g0551600 PE=2<br>SV=1 | 0.61 | -1.63 |
| Q6ZCP8     | Os08g0167500 protein OS=Oryza sativa subsp. japonica<br>GN=Os08g0167500 PE=2 SV=1                             | 0.61 | -1.63 |

|            |                                                                                                            |      |       |
|------------|------------------------------------------------------------------------------------------------------------|------|-------|
| Q6ATS0     | Magnesium-chelatase subunit ChlD, chloroplastic OS=Oryza sativa subsp. japonica GN=CHLD PE=1 SV=1          | 0.61 | -1.63 |
| Q7XTF0     | OSJNBa0072F16.18 protein OS=Oryza sativa subsp. japonica GN=Os04g0462300 PE=4 SV=2                         | 0.61 | -1.63 |
| Q6ZH05     | Os02g0687900 protein OS=Oryza sativa subsp. japonica GN=Os02g0687900 PE=2 SV=1                             | 0.61 | -1.63 |
| Q8W2X4     | Expressed protein OS=Oryza sativa subsp. japonica GN=OSJNBb0060I05.14 PE=2 SV=1                            | 0.62 | -1.62 |
| Q6YZE2     | Glutamate-1-semialdehyde 2,1-aminomutase, chloroplastic OS=Oryza sativa subsp. japonica GN=GSA PE=2 SV=1   | 0.62 | -1.62 |
| Q6Z2T6     | Geranylgeranyl diphosphate reductase, chloroplastic OS=Oryza sativa subsp. japonica GN=CHLP PE=2 SV=1      | 0.62 | -1.62 |
| Q10LT2     | Expressed protein OS=Oryza sativa subsp. japonica GN=LOC_Os03g21780 PE=2 SV=1                              | 0.62 | -1.61 |
| Q0IS49     | Terpene cyclase/mutase family member OS=Oryza sativa subsp. japonica GN=Os11g0562100 PE=3 SV=1             | 0.62 | -1.60 |
| Q7Y168     | Expressed protein OS=Oryza sativa subsp. japonica GN=Os03g0375200 PE=4 SV=1                                | 0.62 | -1.60 |
| Q8GTK0     | Starch synthase, chloroplastic/amyloplastic OS=Oryza sativa subsp. japonica GN=P0710F09.134 PE=3 SV=1      | 0.63 | -1.60 |
| Q6AVL0     | Os03g0602600 protein OS=Oryza sativa subsp. japonica GN=OJ1519_A12.11 PE=4 SV=1                            | 0.63 | -1.60 |
| A0A0P0X4N1 | Os07g0243150 protein (Fragment) OS=Oryza sativa subsp. japonica GN=Os07g0243150 PE=4 SV=1                  | 0.63 | -1.59 |
| O22567     | 1-deoxy-D-xylulose-5-phosphate synthase 1, chloroplastic OS=Oryza sativa subsp. japonica GN=CLA1 PE=2 SV=2 | 0.63 | -1.59 |
| Q69LG7     | Aspartate kinase-homoserine dehydrogenase OS=Oryza sativa subsp. japonica GN=Os09g0294000 PE=2 SV=1        | 0.63 | -1.59 |
| Q9AX68     | Os01g0611000 protein OS=Oryza sativa subsp. japonica GN=P0410E03.33-1 PE=2 SV=1                            | 0.63 | -1.59 |
| Q0DAQ8     | Os06g0638200 protein (Fragment) OS=Oryza sativa subsp. japonica GN=Os06g0638200 PE=4 SV=1                  | 0.63 | -1.58 |
| A0A0P0WS8  | Os06g0146300 protein (Fragment) OS=Oryza sativa subsp. japonica GN=Os06g0146300 PE=4 SV=1                  | 0.63 | -1.58 |
| P0C464     | 30S ribosomal protein S11, chloroplastic OS=Oryza sativa subsp. japonica GN=rps11 PE=3 SV=1                | 0.63 | -1.58 |
| Q5ZAJ0     | Respiratory burst oxidase homolog protein B OS=Oryza sativa subsp. japonica GN=RBOHB PE=1 SV=1             | 0.63 | -1.58 |
| Q5TKG2     | Os05g0594500 protein OS=Oryza sativa subsp. japonica GN=Os05g0594500 PE=4 SV=1                             | 0.64 | -1.57 |
| Q6ZFE5     | Os08g0483200 protein OS=Oryza sativa subsp. japonica GN=OJ1111_H02.19-1 PE=2 SV=1                          | 0.64 | -1.56 |



|            |                                                                                                                 |      |       |
|------------|-----------------------------------------------------------------------------------------------------------------|------|-------|
| Q7XPL2     | Oxygen-dependent coproporphyrinogen-III oxidase, chloroplastic OS=Oryza sativa subsp. japonica GN=CPX PE=2 SV=2 | 0.64 | -1.56 |
| A0A0N7KJF4 | Os04g0538166 protein (Fragment) OS=Oryza sativa subsp. japonica GN=Os04g0538166 PE=4 SV=1                       | 0.64 | -1.56 |
| Q2QP54     | Elongation factor Ts, mitochondrial OS=Oryza sativa subsp. japonica GN=EFTS PE=3 SV=1                           | 0.64 | -1.56 |
| Q336V3     | Cytochrome P450 family protein, expressed OS=Oryza sativa subsp. japonica GN=LOC_Os10g39930 PE=2 SV=1           | 0.64 | -1.55 |
| Q7X7Y5     | OSJNBb0062H02.3 protein OS=Oryza sativa subsp. japonica GN=Os04g0321700 PE=2 SV=2                               | 0.64 | -1.55 |
| Q336T5     | Expansin-B3 OS=Oryza sativa subsp. japonica GN=EXPB3 PE=2 SV=2                                                  | 0.64 | -1.55 |
| Q0J0M2     | Acyl-[acyl-carrier-protein] hydrolase (Fragment) OS=Oryza sativa subsp. japonica GN=Os09g0505300 PE=3 SV=1      | 0.64 | -1.55 |
| Q6K4S7     | Os02g0285300 protein OS=Oryza sativa subsp. japonica GN=Os02g0285300 PE=2 SV=1                                  | 0.65 | -1.55 |
| Q8H4Z0     | Os07g0184800 protein OS=Oryza sativa subsp. japonica GN=OJ1046_F10.127 PE=2 SV=1                                | 0.65 | -1.55 |
| Q0E3V2     | Os02g0152900 protein OS=Oryza sativa subsp. japonica GN=Os02g0152900 PE=2 SV=1                                  | 0.65 | -1.55 |
| Q6Z314     | Os02g0766000 protein OS=Oryza sativa subsp. japonica GN=OJ1004_A11.16-1 PE=2 SV=1                               | 0.65 | -1.55 |
| Q0JE32     | Probable aldo-keto reductase 1 OS=Oryza sativa subsp. japonica GN=Os04g0337500 PE=2 SV=1                        | 0.65 | -1.55 |
| Q0DIP2     | Os05g0373400 protein OS=Oryza sativa subsp. japonica GN=Os05g0373400 PE=2 SV=2                                  | 0.65 | -1.55 |
| Q8W250     | 1-deoxy-D-xylulose 5-phosphate reductoisomerase, chloroplastic OS=Oryza sativa subsp. japonica GN=DXR PE=2 SV=2 | 0.65 | -1.54 |
| Q5Z9S8     | ABC transporter G family member 42 OS=Oryza sativa subsp. japonica GN=ABCG42 PE=2 SV=1                          | 0.65 | -1.53 |
| Q5Z4M6     | Os06g0308000 protein OS=Oryza sativa subsp. japonica GN=Os06g0308000 PE=2 SV=1                                  | 0.65 | -1.53 |
| Q0E2A9     | Os02g0255700 protein OS=Oryza sativa subsp. japonica GN=Os02g0255700 PE=4 SV=1                                  | 0.65 | -1.53 |
| Q7F9I1     | Chaperone protein ClpC1, chloroplastic OS=Oryza sativa subsp. japonica GN=CLPC1 PE=2 SV=2                       | 0.66 | -1.52 |
| Q7F9Y6     | OSJNBa0086O06.22 protein OS=Oryza sativa subsp. japonica GN=Os04g0591000 PE=2 SV=1                              | 0.66 | -1.52 |
| Q7XS47     | OSJNBa0035M09.17 protein OS=Oryza sativa subsp. japonica GN=Os04g0607000 PE=2 SV=2                              | 0.66 | -1.52 |
| Q0IRY4     | Os11g0586300 protein (Fragment) OS=Oryza sativa subsp. japonica GN=Os11g0586300 PE=4 SV=1                       | 0.66 | -1.51 |
| P0CD22     | NAD(P)H-quinone oxidoreductase subunit 2 A, chloroplastic OS=Oryza sativa subsp. japonica GN=ndhB1 PE=2 SV=1    | 0.66 | -1.51 |

|        |                                                                                                                 |      |       |
|--------|-----------------------------------------------------------------------------------------------------------------|------|-------|
| B9FBM2 | Os03g0176600 protein OS=Oryza sativa subsp. japonica<br>GN=Os03g0176700 PE=4 SV=1                               | 0.66 | -1.51 |
| Q10DD6 | Homeodomain protein JUBEL1, putative, expressed<br>OS=Oryza sativa subsp. japonica GN=Os03g0732100 PE=4<br>SV=1 | 0.66 | -1.51 |
| Q5VPQ6 | Os06g0119600 protein OS=Oryza sativa subsp. japonica<br>GN=Os06g0119600 PE=2 SV=1                               | 0.66 | -1.51 |
| Q8S091 | Thioredoxin F, chloroplastic OS=Oryza sativa subsp.<br>japonica GN=Os01g0913000 PE=2 SV=1                       | 0.66 | -1.50 |
| Q5SNH7 | Os01g0191100 protein OS=Oryza sativa subsp. japonica<br>GN=Os01g0191100 PE=2 SV=1                               | 0.67 | -1.50 |
| Q6YVH6 | Hydrolase, alpha/beta fold family-like OS=Oryza sativa<br>subsp. japonica GN=Os02g0705100 PE=2 SV=1             | 0.67 | -1.50 |



NIP\_S4 vs C0\_ Proteins increased in abundance

| Accession | Description                                                                                                                                                                   | FC   |
|-----------|-------------------------------------------------------------------------------------------------------------------------------------------------------------------------------|------|
| Q7XBA6    | Non-specific lipid-transfer protein OS=Oryza sativa subsp. japonica<br>GN=Os11g0115400 PE=2 SV=1                                                                              | 4.67 |
| Q5VRY1    | 18.0 kDa class II heat shock protein OS=Oryza sativa subsp. japonica<br>GN=HSP18.0 PE=2 SV=1                                                                                  | 4.59 |
| P27777    | 16.9 kDa class I heat shock protein 1 OS=Oryza sativa subsp. japonica<br>GN=HSP16.9A PE=1 SV=1                                                                                | 4.53 |
| Q84Q77    | 17.9 kDa class I heat shock protein OS=Oryza sativa subsp. japonica<br>GN=HSP17.9A PE=1 SV=1                                                                                  | 4.31 |
| Q6K7E9    | 18.6 kDa class III heat shock protein OS=Oryza sativa subsp. japonica<br>GN=HSP18.6 PE=2 SV=1                                                                                 | 4.10 |
| P0C5A4    | Late embryogenesis abundant protein 19 OS=Oryza sativa subsp. japonica<br>GN=LEA19 PE=2 SV=1                                                                                  | 4.03 |
| Q84Q72    | 18.1 kDa class I heat shock protein OS=Oryza sativa subsp. japonica<br>GN=HSP18.1 PE=2 SV=1                                                                                   | 4.00 |
| Q652V8    | 16.0 kDa heat shock protein, peroxisomal OS=Oryza sativa subsp. japonica<br>GN=HSP16.0 PE=2 SV=1                                                                              | 3.91 |
| Q8H4P7    | Os07g0147500 protein OS=Oryza sativa subsp. japonica<br>GN=OJ1470_H06.117 PE=2 SV=1                                                                                           | 3.83 |
| Q0J8R9    | Os04g0690800 protein OS=Oryza sativa subsp. japonica GN=Os04g0690800<br>PE=4 SV=1                                                                                             | 3.74 |
| Q7X8R5    | Thioredoxin M2, chloroplastic OS=Oryza sativa subsp. japonica<br>GN=Os04g0530600 PE=2 SV=2                                                                                    | 3.72 |
| Q84J50    | 17.7 kDa class I heat shock protein OS=Oryza sativa subsp. japonica<br>GN=HSP17.7 PE=2 SV=1                                                                                   | 3.46 |
| Q10MK4    | Mitochondrial import inner membrane translocase subunit<br>Tim17/Tim22/Tim23 family protein, putative, expressed OS=Oryza sativa<br>subsp. japonica GN=Os03g0305600 PE=2 SV=1 | 3.42 |
| Q84TB6    | Actin-depolymerizing factor 3 OS=Oryza sativa subsp. japonica GN=ADF3<br>PE=1 SV=1                                                                                            | 3.39 |
| Q10NA1    | Heat shock cognate 70 kDa protein, putative, expressed OS=Oryza sativa<br>subsp. japonica GN=Os03g0277300 PE=3 SV=1                                                           | 3.35 |
| Q2QLS3    | Alpha-amylase/trypsin inhibitor, putative, expressed OS=Oryza sativa subsp.<br>japonica GN=Os12g0630500 PE=2 SV=1                                                             | 3.07 |
| Q8S702    | Glutathione S-transferase GSTU6, putative, expressed OS=Oryza sativa<br>subsp. japonica GN=LOC_Os10g38470 PE=2 SV=1                                                           | 3.06 |
| Q9XFE4    | Peptidylprolyl isomerase OS=Oryza sativa subsp. japonica<br>GN=Os04g0352400 PE=2 SV=2                                                                                         | 3.04 |
| Q9FWU4    | Os10g0491000 protein OS=Oryza sativa subsp. japonica<br>GN=LOC_Os10g34930 PE=2 SV=1                                                                                           | 3.02 |
| Q2R1V2    | Barwin, putative, expressed OS=Oryza sativa subsp. japonica<br>GN=LOC_Os11g37950 PE=2 SV=1                                                                                    | 2.92 |
| Q851F9    | Probable zinc metalloprotease EGY3, chloroplastic OS=Oryza sativa subsp.<br>japonica GN=EGY3 PE=2 SV=1                                                                        | 2.85 |
| A0A0P0XC1 | Os08g0205800 protein (Fragment) OS=Oryza sativa subsp. japonica<br>GN=Os08g0205800 PE=4 SV=1                                                                                  | 2.83 |
| Q10MP7    | Os03g0300400 protein OS=Oryza sativa subsp. japonica GN=Os03g0300400<br>PE=2 SV=1                                                                                             | 2.76 |

|           |                                                                              |      |
|-----------|------------------------------------------------------------------------------|------|
|           | Os04g0107900 protein (Fragment) OS=Oryza sativa subsp. japonica              | 2.74 |
| A0A0P0W6  | GN=Os04g0107900 PE=4 SV=1                                                    |      |
|           | Phosphoglycerate kinase OS=Oryza sativa subsp. japonica                      | 2.72 |
| Q655T1    | GN=Os06g0668200 PE=2 SV=1                                                    |      |
|           | 70 kDa heat shock protein OS=Oryza sativa subsp. japonica                    | 2.65 |
| Q943K7    | GN=Os01g0840100 PE=2 SV=1                                                    |      |
|           | Os05g0468800 protein OS=Oryza sativa subsp. japonica GN=Os05g0468800         | 2.53 |
| Q0DHF7    | PE=4 SV=1                                                                    |      |
|           | Os11g0425600 protein OS=Oryza sativa subsp. japonica GN=Os11g0425600         | 2.51 |
| Q0IT26    | PE=4 SV=1                                                                    |      |
|           |                                                                              | 2.48 |
| Q6ESR4    | Dehydrin DHN1 OS=Oryza sativa subsp. japonica GN=DHN1 PE=2 SV=1              |      |
|           | Os03g0663500 protein (Fragment) OS=Oryza sativa subsp. japonica              | 2.47 |
| Q0DPU1    | GN=Os03g0663500 PE=4 SV=1                                                    |      |
|           | Alpha-galactosidase OS=Oryza sativa subsp. japonica GN=Os10g0492900          | 2.46 |
| A0A0P0XVI | PE=3 SV=1                                                                    |      |
|           | Os04g0423600 protein OS=Oryza sativa subsp. japonica GN=Os04g0423600         | 2.46 |
| A0A0P0WA  | PE=4 SV=1                                                                    |      |
|           | Probable aquaporin TIP1-2 OS=Oryza sativa subsp. japonica GN=TIP1-2 PE=2     | 2.45 |
| Q94CS9    | SV=1                                                                         |      |
|           | Os01g0571166 protein OS=Oryza sativa subsp. japonica GN=Os01g0571166         | 2.43 |
| A0A0P0V4  | PE=4 SV=1                                                                    |      |
|           | DnaK protein, expressed OS=Oryza sativa subsp. japonica GN=Os03g0218500      | 2.43 |
| Q10PW8    | PE=2 SV=1                                                                    |      |
|           |                                                                              | 2.42 |
| Q306J3    | Dirigent protein OS=Oryza sativa subsp. japonica GN=JAC1 PE=2 SV=1           |      |
|           | 24.1 kDa heat shock protein, mitochondrial OS=Oryza sativa subsp. japonica   | 2.40 |
| Q6Z7V2    | GN=HSP24.1 PE=2 SV=1                                                         |      |
|           | Os09g0572700 protein OS=Oryza sativa subsp. japonica GN=Os09g0572700         | 2.39 |
| Q0IZF1    | PE=2 SV=1                                                                    |      |
|           | Os08g0425800 protein OS=Oryza sativa subsp. japonica GN=Os08g0425800         | 2.35 |
| A0A0P0XGI | PE=4 SV=1                                                                    |      |
|           | Os09g0467200 protein OS=Oryza sativa subsp. japonica GN=Os09g0467200         | 2.35 |
| Q93WY5    | PE=2 SV=1                                                                    |      |
|           | Os01g0382000 protein OS=Oryza sativa subsp. japonica GN=Os01g0382000         | 2.35 |
| Q7F2P0    | PE=3 SV=1                                                                    |      |
|           | Non-specific lipid-transfer protein 1 OS=Oryza sativa subsp. japonica GN=LTP | 2.35 |
| Q0IQK9    | PE=1 SV=1                                                                    |      |
|           | Os04g0663700 protein OS=Oryza sativa subsp. japonica GN=Os04g0663700         | 2.33 |
| B9FCZ7    | PE=4 SV=1                                                                    |      |
|           | Os05g0460000 protein OS=Oryza sativa subsp. japonica GN=Os05g0460000         | 2.28 |
| Q6L509    | PE=2 SV=1                                                                    |      |
|           | 23.2 kDa heat shock protein OS=Oryza sativa subsp. japonica GN=HSP23.2       | 2.27 |
| Q7XUW5    | PE=2 SV=2                                                                    |      |
|           |                                                                              | 2.26 |
| Q2QNN5    | Lipoxygenase OS=Oryza sativa subsp. japonica GN=Os12g0559200 PE=3 SV=2       |      |
|           | Os03g0661600 protein (Fragment) OS=Oryza sativa subsp. japonica              | 2.26 |
| A0A0P0W1  | GN=Os03g0661600 PE=4 SV=1                                                    |      |
|           | Germin-like protein 3-6 OS=Oryza sativa subsp. japonica GN=Os03g0694000      | 2.25 |
| Q851K1    | PE=2 SV=1                                                                    |      |

|          |                                                                                                                                              |      |
|----------|----------------------------------------------------------------------------------------------------------------------------------------------|------|
| Q5VP66   | Os01g0644000 protein OS=Oryza sativa subsp. japonica GN=Os01g0644000<br>PE=2 SV=1                                                            | 2.23 |
| Q337E2   | Expressed protein OS=Oryza sativa subsp. japonica GN=Os10g0505900 PE=4<br>SV=1                                                               | 2.21 |
| Q0JIK5   | Os01g0795200 protein OS=Oryza sativa subsp. japonica GN=Os01g0795200<br>PE=3 SV=1                                                            | 2.21 |
| Q7F1U0   | Peroxidase OS=Oryza sativa subsp. japonica GN=OJ1167_G06.125 PE=2 SV=1                                                                       | 2.20 |
| Q6Z563   | Os08g0412800 protein OS=Oryza sativa subsp. japonica GN=Os08g0412800<br>PE=2 SV=1                                                            | 2.19 |
| Q7G649   | Expressed protein OS=Oryza sativa subsp. japonica GN=LOC_Os10g18340<br>PE=2 SV=1                                                             | 2.19 |
| Q653Y0   | Os06g0681200 protein OS=Oryza sativa subsp. japonica GN=Os06g0681200<br>PE=2 SV=1                                                            | 2.18 |
| Q6F2Y7   | Chaperone protein ClpB1 OS=Oryza sativa subsp. japonica GN=CLPB1 PE=2<br>SV=1                                                                | 2.16 |
| Q42993   | Chitinase 1 OS=Oryza sativa subsp. japonica GN=Cht1 PE=2 SV=1                                                                                | 2.15 |
| Q6AUF2   | Os05g0565400 protein OS=Oryza sativa subsp. japonica GN=Os05g0565400<br>PE=2 SV=1                                                            | 2.14 |
| A0A0N7KP | Os07g0683600 protein OS=Oryza sativa subsp. japonica GN=Os07g0683600<br>PE=4 SV=1                                                            | 2.13 |
| Q6ZCR3   | Germin-like protein 8-12 OS=Oryza sativa subsp. japonica<br>GN=Os08g0231400 PE=2 SV=1                                                        | 2.12 |
| Q338P6   | Os10g0389200 protein OS=Oryza sativa subsp. japonica GN=Os10g0389200<br>PE=2 SV=1                                                            | 2.12 |
| Q688T8   | Glucose-1-phosphate adenylyltransferase large subunit 3,<br>chloroplastic/amyloplastic OS=Oryza sativa subsp. japonica GN=AGPL3 PE=1<br>SV=1 | 2.12 |
| Q6Z4I3   | Thioredoxin H2-1 OS=Oryza sativa subsp. japonica GN=Os07g0190800 PE=2<br>SV=1                                                                | 2.09 |
| Q53K52   | Protein PEP-RELATED DEVELOPMENT ARRESTED 1 homolog, chloroplastic<br>OS=Oryza sativa subsp. japonica GN=Os11g0425300 PE=2 SV=1               | 2.09 |
| Q60ER3   | Os05g0393400 protein OS=Oryza sativa subsp. japonica GN=Os05g0393400<br>PE=2 SV=1                                                            | 2.08 |
| Q7F164   | Os01g0940700 protein OS=Oryza sativa subsp. japonica GN=P0432C03.10-1<br>PE=2 SV=1                                                           | 2.06 |
| B7E9D7   | Os01g0124650 protein OS=Oryza sativa subsp. japonica GN=Os01g0124650<br>PE=2 SV=1                                                            | 2.03 |
| Q2QLS9   | Os12g0629700 protein OS=Oryza sativa subsp. japonica<br>GN=LOC_Os12g43430 PE=2 SV=1                                                          | 2.02 |
| Q7XPV4   | OSJNBa0088H09.2 protein OS=Oryza sativa subsp. japonica<br>GN=Os04g0683700 PE=4 SV=1                                                         | 2.02 |
| Q84YK8   | Probable lipoxxygenase 8, chloroplastic OS=Oryza sativa subsp. japonica<br>GN=CM-LOX2 PE=2 SV=1                                              | 1.99 |
| A0A0P0WV | Os06g0323100 protein (Fragment) OS=Oryza sativa subsp. japonica<br>GN=Os06g0323100 PE=4 SV=1                                                 | 1.98 |
| Q8H367   | Os07g0413800 protein OS=Oryza sativa subsp. japonica GN=Os07g0413800<br>PE=2 SV=1                                                            | 1.98 |

|          |                                                                                                                                        |      |
|----------|----------------------------------------------------------------------------------------------------------------------------------------|------|
| Q0J0C4   | Os09g0517000 protein OS=Oryza sativa subsp. japonica GN=Os09g0517000 PE=2 SV=1                                                         | 1.98 |
| Q2R5M2   | Carboxypeptidase OS=Oryza sativa subsp. japonica GN=LOC_Os11g24510 PE=3 SV=1                                                           | 1.98 |
| Q10N98   | 33 kDa secretory protein, putative, expressed OS=Oryza sativa subsp. japonica GN=Os03g0277600 PE=2 SV=1                                | 1.97 |
| Q0DI48   | Thioredoxin-like fold domain-containing protein MRL7L homolog, chloroplastic OS=Oryza sativa subsp. japonica GN=MRL7L PE=2 SV=1        | 1.96 |
| Q8L4V6   | Glutathione S-transferase GSTU6, putative, expressed OS=Oryza sativa subsp. japonica GN=LOC_Os10g38780 PE=2 SV=1                       | 1.95 |
| Q8S1C7   | Cytochrome P450 (CYP72C)-like OS=Oryza sativa subsp. japonica GN=CYP72A32 PE=2 SV=1                                                    | 1.94 |
| Q5QMT0   | Beta-glucosidase 1 OS=Oryza sativa subsp. japonica GN=BGLU1 PE=2 SV=1                                                                  | 1.92 |
| Q6YXZ3   | Os02g0139100 protein OS=Oryza sativa subsp. japonica GN=Os02g0139100 PE=2 SV=1                                                         | 1.92 |
| Q5ZBR8   | Os01g0795000 protein OS=Oryza sativa subsp. japonica GN=Os01g0795000 PE=4 SV=1                                                         | 1.92 |
| Q7XIX0   | Peroxidase OS=Oryza sativa subsp. japonica GN=OJ1167_G06.129 PE=3 SV=1                                                                 | 1.91 |
| A0A0POW3 | Os03g0750100 protein OS=Oryza sativa subsp. japonica GN=Os03g0750100 PE=4 SV=1                                                         | 1.91 |
| Q5ZAV6   | Os01g0783600 protein OS=Oryza sativa subsp. japonica GN=Os01g0783600 PE=2 SV=1                                                         | 1.90 |
| P31110   | Thaumatococcus-like protein OS=Oryza sativa subsp. japonica GN=Os12g0628600 PE=1 SV=1                                                  | 1.90 |
| A5HEI2   | Bowman-Birk type proteinase inhibitor A OS=Oryza sativa subsp. japonica GN=pinA PE=2 SV=1                                              | 1.90 |
| Q5VRH4   | Homogentisate 1,2-dioxygenase OS=Oryza sativa subsp. japonica GN=HGO PE=2 SV=1                                                         | 1.88 |
| Q94E74   | Os01g0511100 protein OS=Oryza sativa subsp. japonica GN=Os01g0511100 PE=2 SV=1                                                         | 1.88 |
| Q67WJ2   | ATP-dependent zinc metalloprotease FTSH 6, chloroplastic OS=Oryza sativa subsp. japonica GN=FTSH6 PE=3 SV=1                            | 1.88 |
| Q8H3A4   | ABC transporter permease protein-like protein OS=Oryza sativa subsp. japonica GN=P0616D06.112-1 PE=2 SV=1                              | 1.87 |
| Q6K623   | Os02g0612900 protein OS=Oryza sativa subsp. japonica GN=Os02g0612900 PE=2 SV=1                                                         | 1.87 |
| Q6H5Y1   | Os02g0228300 protein OS=Oryza sativa subsp. japonica GN=Os02g0228300 PE=4 SV=1                                                         | 1.87 |
| Q2QQS1   | KE2 family protein, expressed OS=Oryza sativa subsp. japonica GN=Os12g0485800 PE=2 SV=1                                                | 1.87 |
| Q94LP4   | (RAP Annotation release2) 2OG-Fe(II) oxygenase domain containing protein OS=Oryza sativa subsp. japonica GN=OSJNBa0042H09.28 PE=2 SV=1 | 1.86 |
| Q8LNZ3   | UDP-glucose 4-epimerase 1 OS=Oryza sativa subsp. japonica GN=UGE-1 PE=2 SV=1                                                           | 1.86 |
| Q10SR3   | 70 kDa heat shock protein OS=Oryza sativa subsp. japonica GN=Os03g0113700 PE=2 SV=1                                                    | 1.84 |

|           |                                                                                                                             |      |
|-----------|-----------------------------------------------------------------------------------------------------------------------------|------|
| Q9SXF8    | Aquaporin PIP 1-3 OS=Oryza sativa subsp. japonica GN=PIP1-3 PE=2 SV=2                                                       | 1.84 |
| Q75T45    | Os12g0555000 protein OS=Oryza sativa subsp. japonica GN=RSOsPR10 PE=2 SV=1                                                  | 1.84 |
| Q5ZCB1    | Os01g0124000 protein OS=Oryza sativa subsp. japonica GN=Os01g0124000 PE=2 SV=1                                              | 1.84 |
| Q6ZFM7    | Os07g0582400 protein OS=Oryza sativa subsp. japonica GN=Os07g0582400 PE=3 SV=1                                              | 1.82 |
| Q75M70    | Expressed protein OS=Oryza sativa subsp. japonica GN=Os03g0381500 PE=2 SV=1                                                 | 1.82 |
| Q7XCS3    | Cys/Met metabolism PLP-dependent enzyme family protein, expressed OS=Oryza sativa subsp. japonica GN=Os10g0517500 PE=2 SV=1 | 1.81 |
| A0A0P0VQ  | Os02g0783625 protein OS=Oryza sativa subsp. japonica GN=Os02g0783625 PE=4 SV=1                                              | 1.81 |
| Q69JX7    | Drought-induced S-like ribonuclease OS=Oryza sativa subsp. japonica GN=Os09g0537700 PE=2 SV=1                               | 1.81 |
| Q6ZCF3    | Os08g0205400 protein OS=Oryza sativa subsp. japonica GN=Os08g0205400 PE=2 SV=1                                              | 1.81 |
| Q10LP5    | Sucrose synthase 4 OS=Oryza sativa subsp. japonica GN=SUS4 PE=2 SV=1                                                        | 1.80 |
| Q5JJV6    | Os01g0965900 protein OS=Oryza sativa subsp. japonica GN=Os01g0965900 PE=2 SV=1                                              | 1.80 |
| Q5SMV5    | Carboxypeptidase OS=Oryza sativa subsp. japonica GN=Os06g0186400 PE=2 SV=1                                                  | 1.79 |
| Q6K4D9    | Os09g0363700 protein OS=Oryza sativa subsp. japonica GN=Os09g0363700 PE=2 SV=1                                              | 1.79 |
| A0A0P0VVI | Os03g0248200 protein (Fragment) OS=Oryza sativa subsp. japonica GN=Os03g0248200 PE=3 SV=1                                   | 1.78 |
| Q5VRM0    | Acyl-CoA-binding domain-containing protein 2 OS=Oryza sativa subsp. japonica GN=ACBP2 PE=1 SV=1                             | 1.78 |
| Q0D840    | Thioredoxin H1 OS=Oryza sativa subsp. japonica GN=TRXH PE=1 SV=1                                                            | 1.77 |
| Q0DAI4    | Os06g0651000 protein OS=Oryza sativa subsp. japonica GN=Os06g0651000 PE=4 SV=1                                              | 1.75 |
| Q6ZFI9    | 60 kDa chaperonin beta subunit OS=Oryza sativa subsp. japonica GN=Os02g0102900 PE=2 SV=1                                    | 1.75 |
| Q75LD9    | Os03g0843300 protein OS=Oryza sativa subsp. japonica GN=OSJNBa0032G11.5 PE=2 SV=1                                           | 1.74 |
| Q10Q92    | CUE domain containing protein, expressed OS=Oryza sativa subsp. japonica GN=Os03g0205000 PE=2 SV=1                          | 1.73 |
| Q6ITC5    | Cell death-related protein OS=Oryza sativa subsp. japonica GN=A2 PE=2 SV=1                                                  | 1.73 |
| Q65XA0    | Probable glutathione S-transferase DHAR1, cytosolic OS=Oryza sativa subsp. japonica GN=DHAR1 PE=1 SV=1                      | 1.73 |
| Q6F391    | Expressed protein OS=Oryza sativa subsp. japonica GN=OSJNBb0021G19.8 PE=2 SV=1                                              | 1.72 |
| Q6Z493    | Protein DETOXIFICATION OS=Oryza sativa subsp. japonica GN=Os07g0502200 PE=3 SV=1                                            | 1.71 |

|          |                                                                                                                                                  |      |
|----------|--------------------------------------------------------------------------------------------------------------------------------------------------|------|
| Q75M67   | Expressed protein OS= <i>Oryza sativa</i> subsp. <i>japonica</i> GN=Os03g0381300 PE=4 SV=1                                                       | 1.71 |
| Q7Y092   | Antitermination NusB domain-containing protein, putative, expressed OS= <i>Oryza sativa</i> subsp. <i>japonica</i> GN=OSJNBa0075A22.21 PE=4 SV=1 | 1.71 |
| P38419   | Lipoxygenase 7, chloroplastic OS= <i>Oryza sativa</i> subsp. <i>japonica</i> GN=CM-LOX1 PE=2 SV=2                                                | 1.68 |
| Q5QLQ5   | Os01g0667200 protein OS= <i>Oryza sativa</i> subsp. <i>japonica</i> GN=Os01g0667200 PE=2 SV=1                                                    | 1.68 |
| Q6Z7K5   | Metal tolerance protein 3 OS= <i>Oryza sativa</i> subsp. <i>japonica</i> GN=MTP3 PE=2 SV=1                                                       | 1.68 |
| Q2QNV2   | Fiber protein Fb19, putative, expressed OS= <i>Oryza sativa</i> subsp. <i>japonica</i> GN=LOC_Os12g36640 PE=2 SV=1                               | 1.67 |
| Q2QXL3   | ACT domain-containing protein, putative, expressed OS= <i>Oryza sativa</i> subsp. <i>japonica</i> GN=Os12g0152700 PE=2 SV=1                      | 1.67 |
| C7J056   | Os03g0859600 protein (Fragment) OS= <i>Oryza sativa</i> subsp. <i>japonica</i> GN=Os03g0859600 PE=3 SV=1                                         | 1.67 |
| A0A0P0WN | Os05g0432700 protein (Fragment) OS= <i>Oryza sativa</i> subsp. <i>japonica</i> GN=Os05g0432700 PE=4 SV=1                                         | 1.67 |
| Q5KQJ3   | Os05g0181901 protein OS= <i>Oryza sativa</i> subsp. <i>japonica</i> GN=Os05g0182000 PE=4 SV=1                                                    | 1.67 |
| Q10PD0   | Purple acid phosphatase OS= <i>Oryza sativa</i> subsp. <i>japonica</i> GN=LOC_Os03g13540 PE=2 SV=1                                               | 1.66 |
| Q5NA77   | C2 domain-containing protein-like OS= <i>Oryza sativa</i> subsp. <i>japonica</i> GN=Os01g0242600 PE=2 SV=1                                       | 1.66 |
| Q941F5   | Os11g0592200 protein OS= <i>Oryza sativa</i> subsp. <i>japonica</i> GN=PR4 PE=2 SV=1                                                             | 1.66 |
| Q8W2X5   | Flavanone 3-dioxygenase 2 OS= <i>Oryza sativa</i> subsp. <i>japonica</i> GN=F3H-2 PE=1 SV=1                                                      | 1.64 |
| Q10QP0   | Os03g0189400 protein OS= <i>Oryza sativa</i> subsp. <i>japonica</i> GN=LOC_Os03g08999 PE=2 SV=1                                                  | 1.64 |
| Q6YVU4   | Os07g0539300 protein OS= <i>Oryza sativa</i> subsp. <i>japonica</i> GN=P0696F12.36-1 PE=2 SV=1                                                   | 1.63 |
| C7J745   | Os09g0491852 protein OS= <i>Oryza sativa</i> subsp. <i>japonica</i> GN=Os09g0491852 PE=4 SV=1                                                    | 1.63 |
| Q8H6G8   | Probable inorganic phosphate transporter 1-8 OS= <i>Oryza sativa</i> subsp. <i>japonica</i> GN=PHT1-8 PE=2 SV=1                                  | 1.62 |
| Q6Z312   | bZIP transcription factor 23 OS= <i>Oryza sativa</i> subsp. <i>japonica</i> GN=BZIP23 PE=2 SV=1                                                  | 1.62 |
| A0A0P0VC | Os01g0949750 protein (Fragment) OS= <i>Oryza sativa</i> subsp. <i>japonica</i> GN=Os01g0949750 PE=4 SV=1                                         | 1.62 |
| O49827   | Chitinase OS= <i>Oryza sativa</i> subsp. <i>japonica</i> GN=Os01g0860500 PE=2 SV=1                                                               | 1.61 |
| Q7XI43   | Metal-transporting P-type ATPase-like protein OS= <i>Oryza sativa</i> subsp. <i>japonica</i> GN=P0524E08.111 PE=2 SV=1                           | 1.61 |
| Q0JIL1   | Probable nucleoredoxin 2 OS= <i>Oryza sativa</i> subsp. <i>japonica</i> GN=Os01g0794400 PE=2 SV=1                                                | 1.61 |
| Q94DD0   | Os01g0859200 protein OS= <i>Oryza sativa</i> subsp. <i>japonica</i> GN=Os01g0859200 PE=2 SV=1                                                    | 1.61 |



|        |                                                                                                                                  |      |
|--------|----------------------------------------------------------------------------------------------------------------------------------|------|
| Q9FRA7 | REF/SRPP-like protein Os05g0151300/LOC_Os05g05940 OS=Oryza sativa subsp. japonica GN=Os05g0151300 PE=2 SV=2                      | 1.60 |
| Q6AVZ3 | Peroxidase OS=Oryza sativa subsp. japonica GN=Os05g0135500 PE=2 SV=1                                                             | 1.60 |
| Q7XJ02 | Probable L-ascorbate peroxidase 7, chloroplastic OS=Oryza sativa subsp. japonica GN=APX7 PE=2 SV=1                               | 1.60 |
| Q6YZI5 | Os08g0558900 protein OS=Oryza sativa subsp. japonica GN=Os08g0558900 PE=2 SV=1                                                   | 1.59 |
| Q10MJ3 | Os03g0306900 protein OS=Oryza sativa subsp. japonica GN=Os03g0306900 PE=2 SV=1                                                   | 1.59 |
| O04226 | Delta-1-pyrroline-5-carboxylate synthase 1 OS=Oryza sativa subsp. japonica GN=P5CS1 PE=2 SV=2                                    | 1.58 |
| Q6K3R5 | Sodium/calcium exchanger NCL2 OS=Oryza sativa subsp. japonica GN=NCL2 PE=2 SV=2                                                  | 1.58 |
| Q6AUV3 | Os03g0430000 protein OS=Oryza sativa subsp. japonica GN=OSJNBa0091B22.9 PE=2 SV=1                                                | 1.58 |
| Q9FP25 | Os01g0303000 protein OS=Oryza sativa subsp. japonica GN=P0035H10.18 PE=2 SV=1                                                    | 1.57 |
| Q6J657 | Cell death associated protein OS=Oryza sativa subsp. japonica GN=Os05g0410200 PE=2 SV=1                                          | 1.57 |
| Q5ZAV7 | Os01g0783500 protein OS=Oryza sativa subsp. japonica GN=Os01g0783500 PE=2 SV=1                                                   | 1.57 |
| Q6ZBK6 | Os08g0519400 protein OS=Oryza sativa subsp. japonica GN=Os08g0519400 PE=4 SV=1                                                   | 1.56 |
| Q10L32 | Peptide methionine sulfoxide reductase B5 OS=Oryza sativa subsp. japonica GN=MSRB5 PE=2 SV=1                                     | 1.56 |
| Q0DCI1 | Pyrophosphate--fructose 6-phosphate 1-phosphotransferase subunit alpha OS=Oryza sativa subsp. japonica GN=Os06g0326400 PE=2 SV=1 | 1.55 |
| Q0D5S1 | Os07g0539900 protein OS=Oryza sativa subsp. japonica GN=Os07g0539900 PE=2 SV=1                                                   | 1.55 |
| Q6Z244 | Os08g0480200 protein OS=Oryza sativa subsp. japonica GN=Os08g0480200 PE=2 SV=1                                                   | 1.54 |
| Q69P84 | Aldehyde dehydrogenase OS=Oryza sativa subsp. japonica GN=OJ1344_B01.27-1 PE=2 SV=1                                              | 1.54 |
| Q2QVJ8 | NADP-dependent oxidoreductase P2, putative, expressed OS=Oryza sativa subsp. japonica GN=Os12g0226700 PE=4 SV=1                  | 1.54 |
| B9FCW0 | Os04g0652700 protein OS=Oryza sativa subsp. japonica GN=Os04g0652700 PE=4 SV=1                                                   | 1.53 |
| Q5QL78 | Os01g0524700 protein OS=Oryza sativa subsp. japonica GN=Os01g0524700 PE=2 SV=1                                                   | 1.53 |
| Q5Z7I5 | Os06g0548200 protein OS=Oryza sativa subsp. japonica GN=Os06g0548200 PE=3 SV=1                                                   | 1.53 |
| Q8S1G9 | Os01g0796400 protein OS=Oryza sativa subsp. japonica GN=P0699H05.27-1 PE=2 SV=1                                                  | 1.53 |
| Q0J8A4 | Glyceraldehyde-3-phosphate dehydrogenase 1, cytosolic OS=Oryza sativa subsp. japonica GN=GAPC1 PE=1 SV=1                         | 1.53 |
| Q6H7E4 | Thioredoxin M1, chloroplastic OS=Oryza sativa subsp. japonica GN=Os02g0639900 PE=2 SV=1                                          | 1.53 |



|          |                                                                                                                    |      |
|----------|--------------------------------------------------------------------------------------------------------------------|------|
| Q651X9   | Os09g0477900 protein OS=Oryza sativa subsp. japonica GN=Os09g0477900<br>PE=3 SV=1                                  | 1.53 |
| Q75GT3   | Chaperone protein ClpB2, chloroplastic OS=Oryza sativa subsp. japonica<br>GN=CLPB2 PE=2 SV=1                       | 1.53 |
| P48642   | Glutathione reductase, cytosolic OS=Oryza sativa subsp. japonica GN=GRC2<br>PE=2 SV=2                              | 1.53 |
| Q5Z5T3   | Os06g0567900 protein OS=Oryza sativa subsp. japonica GN=Os06g0567900<br>PE=3 SV=1                                  | 1.52 |
| Q9FW24   | Os05g0102900 protein OS=Oryza sativa subsp. japonica GN=Os05g0102900<br>PE=2 SV=2                                  | 1.52 |
| Q6AVR6   | Os03g0840200 protein OS=Oryza sativa subsp. japonica GN=Os03g0840200<br>PE=2 SV=1                                  | 1.52 |
| Q7X7N2   | Arginase 1, mitochondrial OS=Oryza sativa subsp. japonica GN=ARG1 PE=2<br>SV=1                                     | 1.52 |
| Q948T6   | Lactoylglutathione lyase OS=Oryza sativa subsp. japonica GN=GLYI-11 PE=1<br>SV=2                                   | 1.52 |
| Q9LGB2   | Os01g0132000 protein OS=Oryza sativa subsp. japonica GN=Os01g0132000<br>PE=2 SV=1                                  | 1.51 |
| A0A0P0WL | Os05g0364600 protein (Fragment) OS=Oryza sativa subsp. japonica<br>GN=Os05g0364600 PE=4 SV=1                       | 1.51 |
| Q5VRJ8   | Peroxisomal membrane protein 11-5 OS=Oryza sativa subsp. japonica<br>GN=PEX11-5 PE=2 SV=1                          | 1.51 |
| Q7XSN6   | Germin-like protein 4-1 OS=Oryza sativa subsp. japonica GN=Os04g0617900<br>PE=2 SV=2                               | 1.51 |
| Q75LJ3   | Electron transfer flavoprotein subunit alpha, mitochondrial OS=Oryza sativa<br>subsp. japonica GN=ETFA PE=2 SV=1   | 1.51 |
| Q5Z9H8   | Peptidyl-prolyl cis-trans isomerase OS=Oryza sativa subsp. japonica<br>GN=P0655A07.5-2 PE=2 SV=1                   | 1.51 |
| Q688X8   | 'putative heat shock protein, hsp40 OS=Oryza sativa subsp. japonica<br>GN=Os05g0562300 PE=2 SV=1                   | 1.51 |
| Q6ZLJ9   | Os07g0209100 protein OS=Oryza sativa subsp. japonica GN=Os07g0209100<br>PE=4 SV=1                                  | 1.51 |
| Q7Y0E8   | Probable nucleoredoxin 1-1 OS=Oryza sativa subsp. japonica<br>GN=Os03g0405500 PE=2 SV=1                            | 1.50 |
| A0A0P0UZ | Os01g0190000 protein OS=Oryza sativa subsp. japonica GN=Os01g0190000<br>PE=4 SV=1                                  | 1.50 |
| Q6ETD9   | Calmodulin-binding protein-like OS=Oryza sativa subsp. japonica<br>GN=Os02g0105500 PE=2 SV=1                       | 1.50 |
| Q6K6Q1   | Phenylalanine ammonia-lyase OS=Oryza sativa subsp. japonica<br>GN=Os02g0626400 PE=2 SV=1                           | 1.50 |
| B9FRA2   | Os06g0127500 protein OS=Oryza sativa subsp. japonica GN=Os06g0127500<br>PE=4 SV=1                                  | 1.50 |
| A0A0P0W6 | Os03g0859600 protein (Fragment) OS=Oryza sativa subsp. japonica<br>GN=Os03g0859600 PE=3 SV=1                       | 1.50 |
| Q7XQ93   | OSJNBa0018M05.15 protein OS=Oryza sativa subsp. japonica<br>GN=Os04g0674700 PE=2 SV=2                              | 1.50 |
| Q652L6   | Monodehydroascorbate reductase 3, cytosolic OS=Oryza sativa subsp.<br>japonica GN=MDAR3 PE=1 SV=1                  | 1.50 |
| Q10LW8   | Hydroxyacylglutathione hydrolase, putative, expressed OS=Oryza sativa<br>subsp. japonica GN=Os03g0332400 PE=2 SV=1 | 1.50 |

## NIP\_ S4 vs CO\_ Proteins decreased in abundance

| Accession | Description                                                                                                 | FC   |       |
|-----------|-------------------------------------------------------------------------------------------------------------|------|-------|
| O64437    | Inositol-3-phosphate synthase 1 OS=Oryza sativa subsp. japonica<br>GN=RINO1 PE=1 SV=2                       | 0.36 | -2.77 |
| Q6K826    | Os02g0781400 protein OS=Oryza sativa subsp. japonica<br>GN=OJ1369_G08.10-1 PE=2 SV=1                        | 0.41 | -2.42 |
| Q8RZQ8    | Bidirectional sugar transporter SWEET1a OS=Oryza sativa subsp. japonica<br>GN=SWEET1A PE=2 SV=1             | 0.42 | -2.39 |
| Q7XKF3    | Protochlorophyllide reductase A, chloroplastic OS=Oryza sativa subsp. japonica GN=PORA PE=2 SV=1            | 0.43 | -2.34 |
| Q5NAM3    | Branched-chain amino acid aminotransferase-like OS=Oryza sativa subsp. japonica GN=Os01g0238500 PE=4 SV=1   | 0.49 | -2.05 |
| Q7XI92    | Os07g0580900 protein OS=Oryza sativa subsp. japonica<br>GN=Os07g0580900 PE=1 SV=1                           | 0.49 | -2.04 |
| Q69TG9    | Glycine-rich protein-like OS=Oryza sativa subsp. japonica<br>GN=Os06g0216700 PE=2 SV=1                      | 0.50 | -2.01 |
| Q6ATB2    | Probable GTP diphosphokinase CRSH2, chloroplastic OS=Oryza sativa subsp. japonica GN=CRSH2 PE=2 SV=1        | 0.51 | -1.96 |
| Q0D5I5    | Os07g0558300 protein OS=Oryza sativa subsp. japonica<br>GN=Os07g0558300 PE=2 SV=1                           | 0.51 | -1.94 |
| Q6ZLK8    | Os07g0134000 protein OS=Oryza sativa subsp. japonica<br>GN=OJ1118_D07.26-1 PE=2 SV=1                        | 0.52 | -1.94 |
| Q6ET88    | Os02g0668100 protein OS=Oryza sativa subsp. japonica<br>GN=Os02g0668100 PE=1 SV=1                           | 0.52 | -1.94 |
| Q2QND9    | Expressed protein OS=Oryza sativa subsp. japonica GN=Os12g0569200<br>PE=4 SV=1                              | 0.52 | -1.92 |
| A0A0P0X75 | Os07g0538700 protein OS=Oryza sativa subsp. japonica<br>GN=Os07g0538700 PE=4 SV=1                           | 0.52 | -1.91 |
| Q6H6D2    | Porphobilinogen deaminase, chloroplastic OS=Oryza sativa subsp. japonica GN=HEMC PE=2 SV=1                  | 0.52 | -1.91 |
| Q6YY42    | Os02g0589000 protein OS=Oryza sativa subsp. japonica<br>GN=Os02g0589000 PE=4 SV=1                           | 0.55 | -1.82 |
| Q0IPL3    | Os12g0189300 protein OS=Oryza sativa subsp. japonica<br>GN=Os12g0189300 PE=4 SV=1                           | 0.57 | -1.77 |
| Q10LR9    | Uroporphyrinogen decarboxylase 2, chloroplastic OS=Oryza sativa subsp. japonica GN=Os03g0337600 PE=3 SV=1   | 0.57 | -1.76 |
| Q10M50    | Magnesium-chelatase subunit ChlH, chloroplastic OS=Oryza sativa subsp. japonica GN=CHLH PE=1 SV=1           | 0.58 | -1.71 |
| Q6KA61    | Os02g0285800 protein OS=Oryza sativa subsp. japonica<br>GN=Os02g0285800 PE=4 SV=1                           | 0.59 | -1.70 |
| Q33AG7    | CMV 1a interacting protein 1, putative, expressed OS=Oryza sativa subsp. japonica GN=Os10g0181600 PE=2 SV=2 | 0.59 | -1.69 |
| Q10J01    | Expressed protein OS=Oryza sativa subsp. japonica GN=Os03g0439700<br>PE=4 SV=1                              | 0.59 | -1.69 |
| Q10SD2    | Expressed protein OS=Oryza sativa subsp. japonica GN=Os03g0126300<br>PE=2 SV=1                              | 0.60 | -1.68 |
| Q0D7H8    | Os07g0245100 protein (Fragment) OS=Oryza sativa subsp. japonica<br>GN=Os07g0245100 PE=4 SV=1                | 0.60 | -1.66 |

|          |                                                                                                            |      |       |
|----------|------------------------------------------------------------------------------------------------------------|------|-------|
| Q8W2X4   | Expressed protein OS=Oryza sativa subsp. japonica<br>GN=OSJNBb0060I05.14 PE=2 SV=1                         | 0.60 | -1.66 |
| Q84QW4   | Os08g0524400 protein OS=Oryza sativa subsp. japonica<br>GN=OJ1191_A10.104 PE=4 SV=1                        | 0.60 | -1.66 |
| Q10LH0   | Divinyl chlorophyllide a 8-vinyl-reductase, chloroplastic OS=Oryza sativa subsp. japonica GN=DVR PE=3 SV=1 | 0.61 | -1.64 |
| Q6ZA95   | Os08g0433300 protein OS=Oryza sativa subsp. japonica<br>GN=Os08g0433300 PE=4 SV=1                          | 0.62 | -1.62 |
| B7FA34   | Os05g0548900 protein OS=Oryza sativa subsp. japonica<br>GN=Os05g0548900 PE=2 SV=1                          | 0.62 | -1.61 |
| Q5Z8V9   | Delta-aminolevulinic acid dehydratase, chloroplastic OS=Oryza sativa subsp. japonica GN=HEMB PE=2 SV=1     | 0.63 | -1.60 |
| O22567   | 1-deoxy-D-xylulose-5-phosphate synthase 1, chloroplastic OS=Oryza sativa subsp. japonica GN=CLA1 PE=2 SV=2 | 0.63 | -1.59 |
| Q53RM0   | Magnesium-chelatase subunit ChII, chloroplastic OS=Oryza sativa subsp. japonica GN=CHLI PE=1 SV=1          | 0.63 | -1.59 |
| Q9AXB0   | Uroporphyrinogen decarboxylase 1, chloroplastic OS=Oryza sativa subsp. japonica GN=Os01g0622300 PE=2 SV=1  | 0.63 | -1.59 |
| Q7F9I1   | Chaperone protein ClpC1, chloroplastic OS=Oryza sativa subsp. japonica GN=CLPC1 PE=2 SV=2                  | 0.63 | -1.58 |
| Q0J0M2   | Acyl-[acyl-carrier-protein] hydrolase (Fragment) OS=Oryza sativa subsp. japonica GN=Os09g0505300 PE=3 SV=1 | 0.63 | -1.58 |
| Q84S01   | Os08g0152700 protein OS=Oryza sativa subsp. japonica<br>GN=OJ1349_D05.118 PE=2 SV=1                        | 0.64 | -1.57 |
| A0A0P0WC | Os03g0593200 protein (Fragment) OS=Oryza sativa subsp. japonica<br>GN=Os03g0593200 PE=4 SV=1               | 0.64 | -1.57 |
| Q7Y168   | Expressed protein OS=Oryza sativa subsp. japonica GN=Os03g0375200<br>PE=4 SV=1                             | 0.64 | -1.57 |
| Q7XN02   | OSJNBb0038F03.9 protein OS=Oryza sativa subsp. japonica<br>GN=OSJNBb0038F03.9 PE=4 SV=1                    | 0.64 | -1.56 |
| Q0DAQ8   | Os06g0638200 protein (Fragment) OS=Oryza sativa subsp. japonica<br>GN=Os06g0638200 PE=4 SV=1               | 0.64 | -1.55 |
| Q6Z2T6   | Geranylgeranyl diphosphate reductase, chloroplastic OS=Oryza sativa subsp. japonica GN=CHLP PE=2 SV=1      | 0.65 | -1.55 |
| Q5VPQ6   | Os06g0119600 protein OS=Oryza sativa subsp. japonica<br>GN=Os06g0119600 PE=2 SV=1                          | 0.65 | -1.55 |
| B7EIQ8   | Os02g0125700 protein OS=Oryza sativa subsp. japonica<br>GN=Os02g0125700 PE=2 SV=1                          | 0.65 | -1.54 |
| Q7XL03   | Chaperone protein ClpD2, chloroplastic OS=Oryza sativa subsp. japonica<br>GN=CLPD2 PE=2 SV=2               | 0.65 | -1.53 |
| Q7F9Y6   | OSJNBa0086O06.22 protein OS=Oryza sativa subsp. japonica<br>GN=Os04g0591000 PE=2 SV=1                      | 0.66 | -1.52 |
| Q69S79   | Os02g0575500 protein OS=Oryza sativa subsp. japonica<br>GN=P0703B01.21-1 PE=4 SV=1                         | 0.66 | -1.52 |
| Q5SNH7   | Os01g0191100 protein OS=Oryza sativa subsp. japonica<br>GN=Os01g0191100 PE=2 SV=1                          | 0.66 | -1.52 |
| Q5TKG2   | Os05g0594500 protein OS=Oryza sativa subsp. japonica<br>GN=Os05g0594500 PE=4 SV=1                          | 0.67 | -1.50 |
